# Supplementary material for: Spiro-fused dibenzo[g,p]chrysene: annulative π-extension (APEX) synthesis and properties
Source: Royal Society of Chemistry journal article supplement (doi:10.1039/d4qo02104e), 2025-01-01
Supplement: d4qo02104e1.pdf [file d4qo02104e1.pdf]

## Supporting Information

### Spiro-fused Dibenzo[g,p]chrysene:

#### Annulative $\pi$ -Extension (APEX) Synthesis and Properties

Kanghui Song<sup>a</sup>, Yuying Zhang<sup>a</sup>, Shuai Wu<sup>a</sup>, Sha Yang<sup>a</sup>, Shengchen Wei<sup>a</sup>,  
Songhua Chen<sup>b</sup>, Hideto Ito<sup>\*,c</sup>, Kenichiro Itami<sup>\*,c,d</sup> and Yuanming Li<sup>\*,a</sup>

<sup>a</sup> *Key Laboratory of Advanced Carbon-Based Functional Materials (Fujian Province University), College of Chemistry, Fuzhou University, Fuzhou 350108, China. E-mail: yuanming.li@fzu.edu.cn (Y.M. Li)*

<sup>b</sup> *College of Chemistry and Material, Fujian Provincial Key Laboratory of Clean Energy Materials, Longyan University, Longyan, 364000, China.*

<sup>c</sup> *Institute of Transformative Bio-Molecules (WPI-ITbM), Nagoya University, Chikusa, Nagoya 464-8602, Japan. E-mail: ito.hideto.p4@jf.mail.nagoya-u.ac.jp (H. Ito)*

<sup>d</sup> *Molecule Creation Laboratory, Cluster for Pioneering Research, RIKEN, Wako, Saitama 351-0198, Japan. E-mail: kenichiro.itami@riken.jp (K. Itami)*

# Table of Contents

|                                                         |    |
|---------------------------------------------------------|----|
| 1. General information .....                            | 3  |
| 1.1 Chemicals information .....                         | 3  |
| 1.2 Characterization of synthesized compounds .....     | 3  |
| 1.3 Photophysical measurements.....                     | 3  |
| 1.4 Electrochemical measurements.....                   | 3  |
| 1.5 Computational study .....                           | 5  |
| 1.6 X-ray crystal diffraction .....                     | 5  |
| 1.7 Thermal property test.....                          | 5  |
| 2. The experiment method .....                          | 6  |
| 3. Spectroscopic data .....                             | 15 |
| 4. Electrochemical data.....                            | 20 |
| 4.1 <b>SFC</b> .....                                    | 20 |
| 4.2 <b>C-SFC</b> .....                                  | 20 |
| 4.3 <b>O-SFC</b> .....                                  | 20 |
| 4.4 <b>S-SFC</b> .....                                  | 21 |
| 4.5 <b>N-SFC</b> .....                                  | 21 |
| 4.6 <b>SBC</b> .....                                    | 22 |
| 4.7 <b>SBP</b> .....                                    | 22 |
| 5. Computational study .....                            | 23 |
| 5.1 The TD-DFT calculation.....                         | 23 |
| 5.2 Cartesian coordinates of optimized structures ..... | 37 |
| 6. X-ray data .....                                     | 44 |
| References .....                                        | 49 |
| NMR Spectrogram .....                                   | 50 |

## **1. General information**

### **1.1 Chemicals information**

Unless otherwise specified, all other chemicals and solvents were purchased from Energy chemical, J&K, Adamas, or TCI chemicals, and were used as received without further purification.

### **1.2 Characterization of synthesized compounds**

Newly synthesized compounds were characterized by  $^1\text{H}$  NMR,  $^{13}\text{C}$  NMR, and high-resolution mass spectroscopy. Chemical shift values were recorded as parts per million (ppm) relative to tetramethylsilane (TMS), chloroform, or Dimethyl sulfoxide as internal standard, and coupling constants ( $J$ ) in Hertz. The following abbreviations were used to explain the multiplicities: s = singlet, d = doublet, t = triplet, q = quartet, m = multiplet, br = broad. Mass spectra were recorded on an Agilent Q-TOF 6520 system using electrospray ionization in Positive/Negative ion detection (APCI<sup>+</sup>/APCI<sup>-</sup>) or (ESI<sup>+</sup>/ESI<sup>-</sup>) mode. Significant fragments are reported in the following fashion: m/z (relative intensity).

### **1.3 Photophysical measurements**

The ultraviolet-visible (UV-vis) spectra were obtained using UV-2700 220v CH and the photoluminescence (PL) spectra were recorded at room temperature on a HITACHI F-7000. UV-vis measurements were carried out using anhydrous cyclohexane solution at a sample concentration of 0.1 mM. (Transparent cuvette on four sides: 1×1×5 cm<sup>3</sup>); PL measurements were carried out using anhydrous cyclohexane solution at the same concentration as UV measure.

### **1.4 Electrochemical measurements**

Cyclic voltammetry experiments were carried out with electrochemical workstation PGSTAT204 Autolab, Vantone, Switzerland. A standard three-electrode system was used: Ag/AgCl (3.0 M KCl solution) electrode reference electrode; Glassy carbon electrode working electrode; A platinum wire

electrode is the opposite electrode. 0.1 M tetrabutylammonium hexafluorophosphate was used as the supporting electrolyte, and the sweep speed of the cyclic voltammetry test was 100 mV/s. The samples were treated with N<sub>2</sub> before the test. Before performing electrochemical cleaning, the electrode should be sonicated in ethanol and deionized water for 1~3 mins respectively to obtain a clean electrode. There is no graininess on the electrode surface when polishing on a Microcloth polishing fleece coated with 1 μM and 0.05 μM alumina powder (both purchased from Shanghai Chenhua) and the polishing can be stopped. Specifically, the electrode is a silver wire that is coated with a thin layer of silver chloride and an insulated lead wire connects the silver wire with a measuring instrument. The electrode also consists of a porous plug on one end which will allow contact between the field environment with the silver chloride electrolyte. Saturated potassium chloride is added inside the body of the electrode to stabilize the silver chloride concentration and in this condition, the electrode's reference potential is known to be +0.197 V at 25 °C. The measurements were done in 1.0 mM DMF solution with 0.1 M tetrabutylammonium hexafluorophosphate (*n*-Bu<sub>4</sub>NPF<sub>6</sub>, TCI chemicals) as supporting electrolyte at a scan rate of 100 mV/s. The experiment was performed with a positive scan from 0 V to 1.6-1.8 V (determined by the nature of the compound); and a negative scan from 0 V to -2.6--2.8 V (again, determined by the nature of the compound).

We determined the  $E_{Fc/Fc^+}$  of ferrocene in each test to calibrate the  $E$  values of **SFCs**. The following empirical formula was used for HOMO or LUMO determined from cyclic voltammetry (EC):

$$LUMO_{EC} = -e(4.8 + E_{re})$$

$$HOMO_{EC} = -e(4.8 + E_{ox})$$

### **1.5 Computational study**

The Gaussian 16W running on the Linux system was used for optimization B3LYP/6-31G(d). Structures were optimized without any symmetry assumptions. Zero-point energy, enthalpy, and Gibbs free energy at 298.15 K and 1 atm were estimated from the gas-phase studies. Harmonic vibration frequency calculation at the same level was performed to verify all stationary points as local minima (with no imaginary frequency) or transition states (with one imaginary frequency). Visualization of the results was performed by the use of GaussView 6.0 software<sup>1</sup> and Multiwfn software<sup>2</sup>.

### **1.6 X-ray crystal diffraction**

Crystal data were collected using a Rigaku-AFC7 equipped with a Rigaku Saturn CCD area-detector system. The measurements were made using monochromatic Mo K $\alpha$  radiation ( $\lambda = 0.71073 \text{ \AA}$ ) under a cold nitrogen stream.

### **1.7 Thermal property test**

The thermogravimetric analyses (TGA) were obtained using NETZSCH 449F5.

## 2. The experiment method

2-1. Spiro compounds (**1a**, **1b**, **1c**, **1d**, **1e**)<sup>3</sup> and 2-bromo-2'-ethynyl-1,1'-biphenyl<sup>4</sup> were prepared according to reported method.

### Phenanthrenone

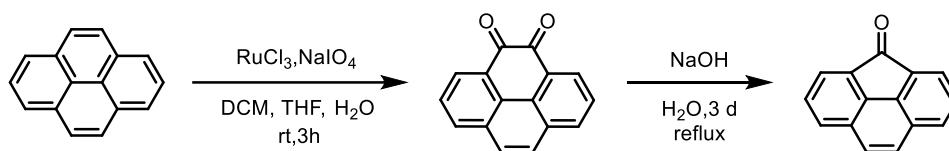

**Scheme S1:** Synthesis of phenanthrenone

The synthesis of phenanthrenone followed the procedure of Filippov, Schneider and co-workers.<sup>5</sup>  $^1\text{H}$  and  $^{13}\text{C}$  NMR spectra are consistent with the previous report.  $^1\text{H}$  NMR (500 MHz, Chloroform-*d*)  $\delta$  7.78 (d,  $J = 8.0\text{Hz}$ , 2H), 7.69 (d,  $J = 7.0\text{Hz}$ , 2H), 7.64 (s, 2H), 7.49 (t,  $J = 7.0\text{Hz}$ , 2H).  $^{13}\text{C}$  NMR (125 MHz, Chloroform-*d*)  $\delta$  193.6, 138.9, 132.9, 130.7, 129.1, 127.2, 125.3, 122.4.

### $\text{Pd}(\text{CH}_3\text{CN})_4(\text{SbF}_6)_2$

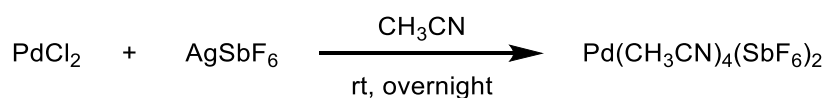

To a suspension of  $\text{PdCl}_2$  (88 mg, 0.50 mmol) in  $\text{CH}_3\text{CN}$  (5.0 mL) was added  $\text{AgSbF}_6$  (344 mg, 1.00 mmol), and the resultant mixture was stirred at room temperature overnight. The reaction mixture was filtrated, then  $\text{Et}_2\text{O}$  was added into the filtrate to recrystallize  $\text{Pd}(\text{CH}_3\text{CN})_4(\text{SbF}_6)_2$ . The complex was collected by filtration (315 mg, 85%).

### 4,4'-spirobi[cyclopenta[def]phenanthrene] (SBP)

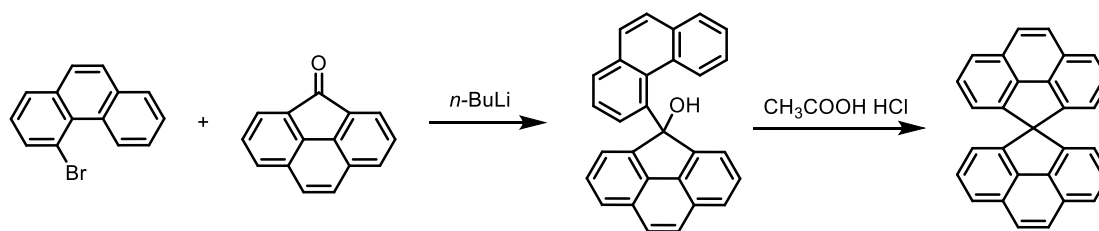

**Scheme S2:** Synthesis of **SBP**

2-bromo-2'-ethynyl-1,1'-biphenyl (91 mg, 0.35 mmol, 1.1 equiv.) was dissolved in dry THF (1.0 mL) under argon atmosphere, cooled at  $-78^{\circ}\text{C}$ , and stirred during 10 minutes at this temperature. *n*-BuLi solution (1.6 M in hexane, 0.3 ml, 1.3 equiv.) was then slowly injected via a syringe. The resulting yellow mixture was stirred at the same temperature for 1 hour. 4H-cyclopenta[def]phenanthren-4-one (65 mg, 0.32 mmol, 1.0 equiv.) was then added immediately, the mixture was stirred for 3 hours in room temperature.

Add 2.0 ml of methanol to the reaction solution, then concentrated the solution under reduced pressure. Without other purification, the crude was dissolved into a mixture of acetic acid/hydrochloric acid (5.0 mL/0.5 mL) and warmed at  $100^{\circ}\text{C}$  during 3 hours under stirring. Then, the mixture was poured into water/ice (50.0 mL), and the solution was neutralized with solid sodium hydroxide until pH reach 7. Then, the organic layer was extracted three times with dichloromethane ( $3 \times 50.0$  mL). The combined organic extracts were dried over magnesium sulfate, filtered, and concentrated under reduced pressure. The residue was purified by flash chromatography on silica gel (petroleum ether) to afford a white solid (70 mg, 60%). <sup>1</sup>H NMR (600 MHz, Chloroform-*d*)  $\delta$  7.99 (s, 4H), 7.89 (d,  $J = 7.9$  Hz, 4H), 7.48 (t,  $J = 7.5$  Hz, 4H), 6.91 (td,  $J = 12.8, 11.2, 7.1$  Hz, 4H). <sup>13</sup>C NMR (151 MHz, Chloroform-*d*)  $\delta$  147.0, 138.3, 128.3, 128.3, 125.8, 123.9, 120.4, 69.5.

HRMS (ESI): Exact mass calculated for C<sub>29</sub>H<sub>16</sub> [M+H]<sup>+</sup>: 365.1325, mass found: 365.1326.

## 2-2. APEX Reaction of spiro compounds with Siloles

General procedure

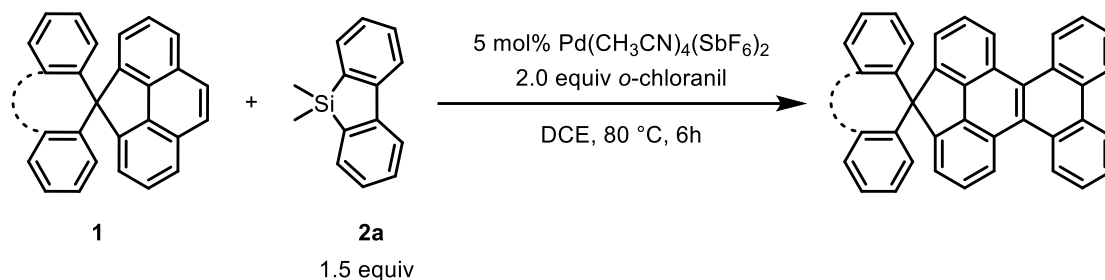

**Scheme S3:** APEX synthesis for **SFCs**

A solution of phenanthrene derivative **1** (0.30 mmol, 1.0 equiv.), dimethyldibenzosilole **2a** (0.45 mmol, 1.5 equiv.), Pd(CH<sub>3</sub>CN)<sub>4</sub>(SbF<sub>6</sub>)<sub>2</sub> (11 mg, 15 μmol, 5 mol%), and *o*-chloranil (148 mg, 0.60 mmol, 2.0 equiv.) in 1,2-Dichloroethane (3.0 mL) was stirred at 80 °C in the screw cap glass tube. After 6 hours, the reaction mixture was cooled to room temperature, and then passed through a short pad of silica gel (eluent: petroleum ether/dichloromethane). After the organic solvent was removed under reduced pressure, the residue was purified by silica gel column chromatography to yield π-extended spiro compounds.



**spiro[benzo[*p*]indeno[7,1,2-*ghi*] chrysene-4,9'-fluorene] (SFC)**

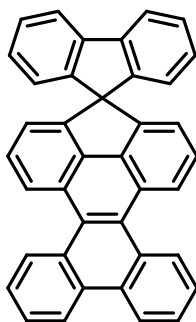

Flash column chromatography (petroleum ether/dichloromethane = 20:1), Yield: 80 mg, 54%, white solid.

$^1\text{H}$  NMR (600 MHz, )  $\delta$  9.16 (d,  $J = 7.9$  Hz, 2H), 8.83 (d,  $J = 7.9$  Hz, 2H), 8.73 (d,  $J = 7.9$  Hz, 2H), 7.95 (d,  $J = 7.7$  Hz, 2H), 7.80 – 7.72 (m, 4H), 7.61 (t,  $J = 7.4$  Hz, 2H), 7.43 (t,  $J = 7.4$  Hz, 2H), 7.12 (t,  $J = 7.4$  Hz, 2H), 7.07 (d,  $J = 7.1$  Hz, 2H), 6.75 (d,  $J =$

7.6 Hz, 2H).  $^{13}\text{C}$  NMR (151 MHz, Chloroform-*d*)  $\delta$  148.1, 147.8, 142.0, 138.4, 131.0, 130.7, 128.8, 128.6, 128.3, 128.1, 128.0, 127.0, 126.1, 125.9, 124.4, 123.8, 120.6, 120.3, 67.7.

HRMS (ESI): Exact mass calculated for  $\text{C}_{39}\text{H}_{22}$   $[\text{M}]^+$ : 490.1716, mass found: 490.1722.

**10*H*-spiro[anthracene-9, 4'-benzo[*p*]indeno[7,1,2-*ghi*] chrysene] (C-SFC)**

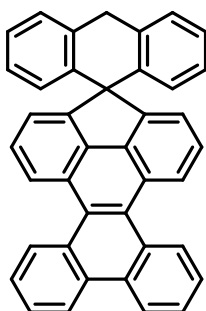

Flash column chromatography (petroleum ether/dichloromethane = 20:1), Yield: 87 mg, 58%, white solid.

$^1\text{H}$  NMR (600 MHz, Chloroform-*d*)  $\delta$  9.14 (dd,  $J = 7.8, 1.8$  Hz, 2H), 8.82 (dd,  $J = 7.9, 1.7$  Hz, 2H), 8.73 (dd,  $J = 8.2, 2.4$  Hz, 2H), 7.79 – 7.71 (m, 4H), 7.66 (t,  $J = 7.6$  Hz, 2H), 7.49 (d,  $J = 7.7$  Hz, 2H), 7.39 (dd,  $J = 7.2, 2.6$  Hz, 2H), 7.23 (td,  $J = 7.4,$

1.3 Hz, 2H), 6.94 – 6.89 (m, 2H), 6.53 (dd,  $J = 8.3, 4.0$  Hz, 2H), 4.65 (s, 2H).  $^{13}\text{C}$  NMR (151 MHz, Chloroform-*d*)  $\delta$  153.3, 138.9, 136.8, 134.9, 130.9, 130.6, 128.8, 128.6, 128.5, 128.4, 127.3, 127.0, 126.9, 126.7, 126.1, 125.6, 123.7, 121.5, 35.7.

HRMS (ESI): Exact mass calculated for  $\text{C}_{40}\text{H}_{24}$   $[\text{M}]^+$ : 504.1873, mass found: 504.1869.

**spiro[benzo[*p*]indeno[7,1,2-*ghi*] chrysene-4,9'-thioxanthene] (S-SFC)**

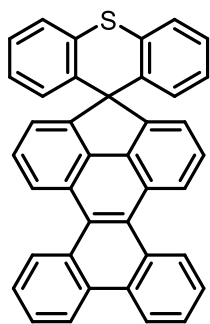

Flash column chromatography (petroleum ether/dichloromethane = 15:1), Yield: 120 mg, 76%, white solid.

$^1\text{H}$  NMR (600 MHz, Chloroform-*d*)  $\delta$  9.10 (dd,  $J = 8.0, 1.5$  Hz, 2H), 8.80 (dd,  $J = 8.0, 1.6$  Hz, 2H), 8.74 (d,  $J = 8.1$  Hz, 2H), 7.93 (d,  $J = 7.1$  Hz, 2H), 7.78 – 7.68 (m, 6H), 7.55 (dd,  $J = 7.9, 1.4$  Hz, 2H), 7.20 (ddd,  $J = 8.0, 7.2, 1.4$  Hz, 2H), 6.88 (ddd,  $J = 8.3, 7.1, 1.4$  Hz, 2H), 6.69 (dd,  $J = 8.1, 1.4$  Hz, 2H).  $^{13}\text{C}$  NMR (151 MHz, Chloroform-*d*)  $\delta$  151.2, 137.1, 136.0, 131.8, 130.8, 130.6, 128.7, 128.6, 128.4, 127.8, 127.5, 127.0, 126.9, 126.6, 126.4, 126.3, 126.2, 123.7, 122.2, 63.4.

HRMS (ESI): Exact mass calculated for  $\text{C}_{39}\text{H}_{22}\text{S}$  [ $\text{M}$ ] $^+$ : 522.1437, mass found: 522.1453.

**spiro[benzo[*p*]indeno[7,1,2-*ghi*] chrysene-4,9'-xanthene] (O-SFC)**

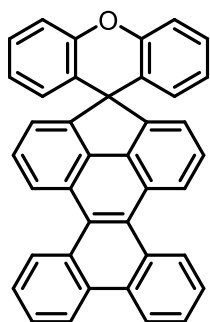

Flash column chromatography (petroleum ether/dichloromethane = 15:1), Yield: 118 mg, 78%, white solid.

$^1\text{H}$  NMR (600 MHz, Chloroform-*d*)  $\delta$  9.13 (dd,  $J = 7.9, 1.6$  Hz, 2H), 8.82 (dd,  $J = 7.9, 1.7$  Hz, 2H), 8.74 (d,  $J = 8.1$  Hz, 2H), 7.75 (dddd,  $J = 16.8, 8.3, 6.9, 1.5$  Hz, 4H), 7.47 (d,  $J = 7.1$  Hz, 2H), 7.33 (dd,  $J = 8.3, 1.3$  Hz, 2H), 7.27 – 7.22 (m, 3H), 6.77

(ddd,  $J = 8.2, 7.1, 1.3$  Hz, 2H), 6.45 (dd,  $J = 7.9, 1.6$  Hz, 2H).  $^{13}\text{C}$  NMR (151 MHz, Chloroform-*d*)  $\delta$  153.1, 151.8, 136.3, 130.9, 130.7, 128.8, 128.7, 128.6, 128.5, 127.9, 127.1, 127.0, 126.1, 126.0, 124.6, 123.8, 123.5, 121.8, 117.1, 56.6.

HRMS (ESI): Exact mass calculated for  $\text{C}_{39}\text{H}_{22}\text{O}$  [ $\text{M}$ ] $^+$ : 506.1665, mass found: 506.1675.

### **4*H*-benzo[*p*]indeno[7,1,2-*ghi*] chrysen-4-one (1f)**

A solution of phenanthrene derivative 4*H*-cyclopenta[*def*]phenanthren-4-one (62 mg, 0.30 mmol, 1.0 equiv.), silicon-bridged aromatics **2a** (95 mg, 0.450 mmol, 1.5 equiv.), Pd(CH<sub>3</sub>CN)<sub>4</sub>(SbF<sub>6</sub>)<sub>2</sub> (12 mg, 15 μmol, 5 mol%), and *o*-chloranil (148 mg, 0.60 mmol, 2.0 equiv.) in DCE (2.0 mL) was stirred at 80 °C in the screw cap glass tube. After 4 hours, the reaction mixture was cooled to room temperature, and then passed through a short pad of silica gel (eluent: petroleum ether/dichloromethane = 5:1). After the organic solvent was removed under reduced pressure, the residue was purified by silica gel column chromatography to yield **4*H*-benzo[*p*]indeno[7,1,2-*ghi*] chrysen-4-one** (93 mg, 88%).

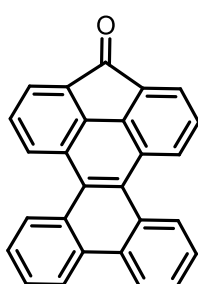

<sup>1</sup>H NMR (600 MHz, Chloroform-*d*) δ 8.76 (d, *J* = 8.1 Hz, 2H), 8.70 (dd, *J* = 8.2, 1.4 Hz, 2H), 8.61 (d, *J* = 8.3 Hz, 2H), 7.79 (d, *J* = 6.8 Hz, 2H), 7.70 (ddd, *J* = 8.1, 7.0, 1.3 Hz, 2H), 7.64 (ddd, *J* = 8.2, 6.9, 1.4 Hz, 2H), 7.58 (ddd, *J* = 8.2, 6.8, 1.7 Hz, 2H).

<sup>13</sup>C NMR (151 MHz, Chloroform-*d*) δ 193.8, 139.6, 132.9, 132.5, 130.5, 130.2, 129.0, 128.1, 127.7, 127.3, 127.0, 125.4, 123.7, 122.3.

HRMS (ESI): Exact mass calculated for C<sub>27</sub>H<sub>15</sub>O [M+H]<sup>+</sup>: 355.1117, mass found: 355.1116.

### **The large scale synthesis of 1f**

A solution of phenanthrene derivative 4*H*-cyclopenta[*def*]phenanthren-4-one (204 mg, 1.0 mmol, 1.0 equiv.), silicon-bridged aromatics **2a** (315 mg, 1.5 mmol, 1.5 equiv.), Pd(CH<sub>3</sub>CN)<sub>4</sub>(SbF<sub>6</sub>)<sub>2</sub> (37 mg, 50 μmol, 5 mol%), and *o*-chloranil (491 mg, 2.0 mmol, 2.0 equiv.) in DCE (9.0 mL) was stirred at 80 °C in the screw cap glass tube. After 8 hours, the reaction mixture was cooled to room temperature, and then passed through a short pad of silica gel (eluent: petroleum ether/dichloromethane = 5:1). After the organic solvent was removed under reduced pressure, the residue was purified by silica gel column chromatography to yield **4*H*-benzo[*p*]indeno[7,1,2-*ghi*] chrysen-4-one** (195 mg, 55%).

2-3. 10-phenyl-10*H*-spiro[acridine-9,4'-benzo[*p*]indeno[7,1,2-*gh*]chrysene] (*N*-SFC)

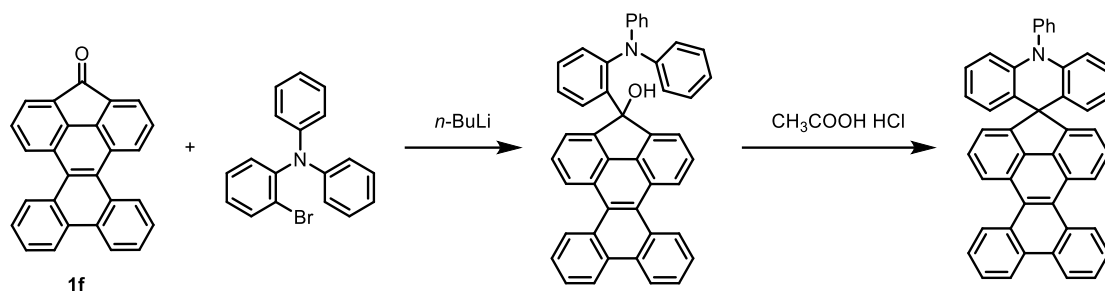

**Scheme S4:** Synthesis for *N*-SFC

2-Bromo-N,N-diphenylbenzenamine (36 mg, 0.11 mmol, 1.1 equiv.) was dissolved in dry THF (0.5 mL) under argon atmosphere, cooled at  $-78^{\circ}\text{C}$ , and stirred for 10 minutes at this temperature. *n*-BuLi solution (1.6 M in hexane, 0.3 ml, 1.3 equiv.) was then slowly injected via a syringe. The resulting yellow mixture was stirred at the same temperature for 1 hour. 4H-cyclopenta[*def*]phenanthren-4-one (36 mg, 0.1 mmol, 1 equiv.) was then added immediately, the mixture was stirred for 3 hours in room temperature.

Add 2.0 ml of methanol to the reaction solution, then concentrated the solution under reduced pressure. Without other purification, the crude was dissolved into a mixture of acetic acid/hydrochloric acid (3.0 mL/0.3 mL) and warmed at  $100^{\circ}\text{C}$  during 3 hours under stirring. Then, the mixture was poured into water/ice (40.0 mL), and the solution was neutralized with solid sodium hydroxide until pH reach 7. Then, the organic layer was extracted three times with dichloromethane ( $3 \times 40.0$  mL). The combined organic extracts were dried over magnesium sulfate, filtered, and concentrated under reduced pressure. The residue was purified by flash chromatography on silica gel (petroleum ether) to afford a white solid (35 mg, 61%).  $^1\text{H}$  NMR (600 MHz, Chloroform-*d*)  $\delta$  9.15 (dd,  $J = 7.7, 1.7$  Hz, 2H), 8.82 (dd,  $J = 7.7, 1.8$  Hz, 2H), 8.74 (dd,  $J = 7.7, 1.0$  Hz, 2H), 7.78 – 7.71 (m, 10H), 7.64 – 7.60 (m, 3H), 6.98 (ddd,  $J = 8.5, 7.0, 1.6$  Hz, 2H), 6.57 (ddd,  $J = 8.1, 7.0, 1.2$  Hz, 2H), 6.48 (ddd,  $J = 10.0, 8.2, 1.4$  Hz, 4H).  $^{13}\text{C}$  NMR (151 MHz, Chloroform-*d*)  $\delta$  153.9, 141.7, 141.2, 135.8, 131.3, 131.2, 130.9, 130.6, 128.8, 128.6, 128.6, 127.6, 127.4, 126.9, 126.1, 125.7,

124.4, 123.7, 121.8, 120.8, 114.8, 59.5. HRMS (ESI): Exact mass calculated for  $C_{45}H_{27}N$   $[M]^+$ : 581.2138, mass found: 581.2146.

### Synthesis of SFC from 1f and 2-Bromobiphenyl

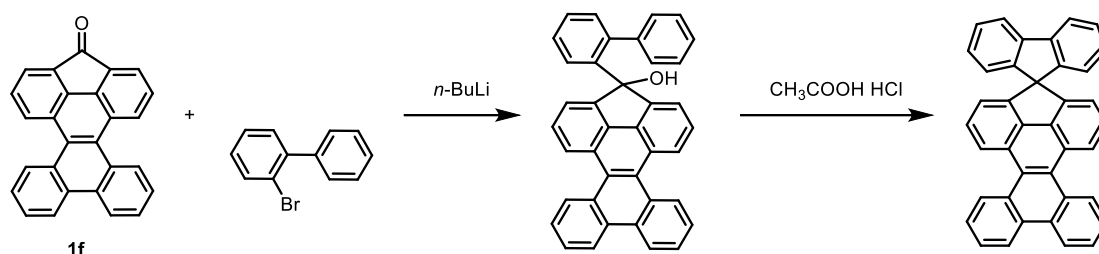

**Scheme S5:** Synthesis of SFC from 1f and 2-Bromobiphenyl

2-Bromobiphenyl (77 mg, 0.33 mmol, 1.1 equiv.) was dissolved in dry THF (1.5 mL) under argon atmosphere, cooled at  $-78^{\circ}\text{C}$ , and stirred for 10 minutes at this temperature. *n*-BuLi solution (1.6 M in hexane, 2.6 ml, 1.4 equiv.) was then slowly injected via a syringe. The resulting yellow mixture was stirred at the same temperature for 1 hour. 4H-cyclopenta[def]phenanthren-4-one (106 mg, 0.3 mmol, 1 equiv.) was then added immediately, the mixture was stirred for 3 hours in room temperature.

Add 2.0 ml of methanol to the reaction solution, then concentrated the solution under reduced pressure. Without other purification, the crude was dissolved into a mixture of acetic acid/hydrochloric acid (5.0 mL/0.5 mL) and warmed at  $100^{\circ}\text{C}$  during 3 hours under stirring. Then, the mixture was poured into water/ice (50.0 mL), and the solution was neutralized with solid sodium hydroxide until pH reach 7. Then, the organic layer was extracted three times with dichloromethane ( $3 \times 50.0$  mL). The combined organic extracts were dried over magnesium sulfate, filtered, and concentrated under reduced pressure. The residue was purified by flash chromatography on silica gel (petroleum ether) to afford a white solid (75 mg, 51%).

## 2:1 APEX reaction of 2,2'-diiodobiphenyl with **SBP**

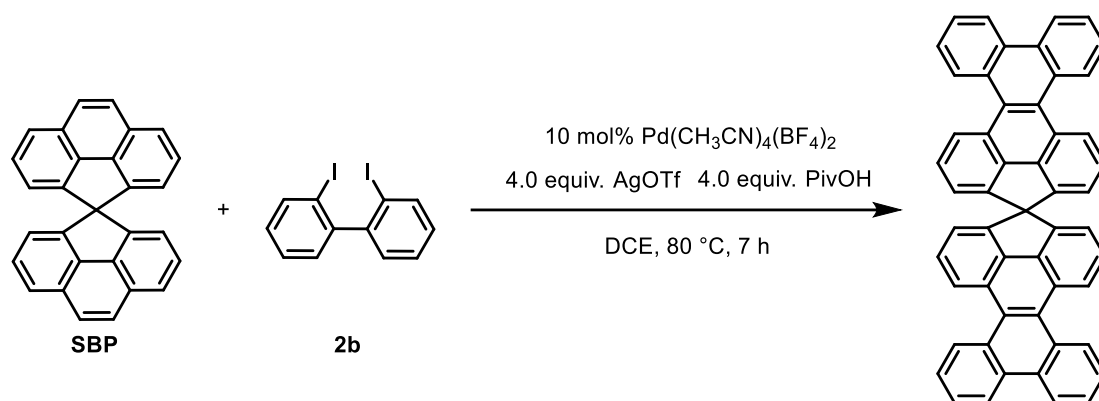

**Scheme S6:** APEX synthesis for **SBC**

### **4, 4'-spirobi[benzo[*p*]indeno[7,1,2-*ghi*] chrysene] (SBC)**

To a screw-capped glass tube containing a magnetic stirrer bar were added 4,4'-spirobi[cyclopenta[*def*]phenanthrene] (37 mg, 0.10 mmol, 1.0 equiv.), 2,2'-diiodobiphenyl (163 mg, 0.40 mmol, 4.0 equiv.), AgOTf (103 mg, 0.40 mmol, 4.0 equiv.), Pd(CH<sub>3</sub>CN)<sub>4</sub>(BF<sub>4</sub>)<sub>2</sub> (5 mg, 10 μmol, 10 mol%), PivOH (41 mg, 0.40 mmol, 4.0 equiv.) and 1,2-dichloroethane (2.0 mL) under a stream of nitrogen. After stirring at 80 °C for 7 hours, the reaction mixture was cooled to room temperature, and then passed through a short pad of silica gel (eluent: dichloromethane). After the organic solvent was removed under reduced pressure, the residue was purified by flash column chromatography (petroleum ether/dichloromethane = 10:1) to yield **SBC** (40 mg, 60%) as a white solid. <sup>1</sup>H NMR (600 MHz, Chloroform-*d*) δ 9.21 (dd, *J* = 7.7, 1.8 Hz, 4H), 8.88 – 8.84 (m, 4H), 8.80 (d, *J* = 8.1 Hz, 4H), 7.83 – 7.75 (m, 8H), 7.63 (dd, *J* = 8.1, 7.1 Hz, 4H), 7.09 (d, *J* = 7.1 Hz, 4H). <sup>13</sup>C NMR (151 MHz, Chloroform-*d*) δ 146.9, 138.5, 131.0, 130.7, 128.7, 128.6, 128.3, 127.0, 127.0, 126.2, 126.0, 123.7, 120.8, 69.1.

HRMS (ESI): Exact mass calculated for C<sub>53</sub>H<sub>28</sub> [M]<sup>+</sup>: 664.2186, mass found: 664.2192.

### 3. Spectroscopic data

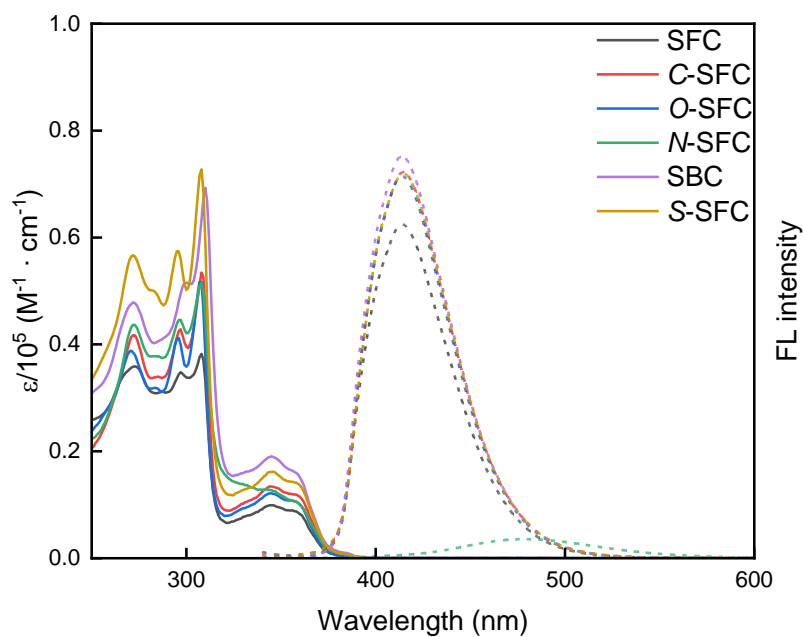

**Figure S1** UV/vis absorption spectra (solid line) and fluorescence spectra (dotted line) of SFCs ( $c = 1 \times 10^{-5} M$ ) in dichloromethane.

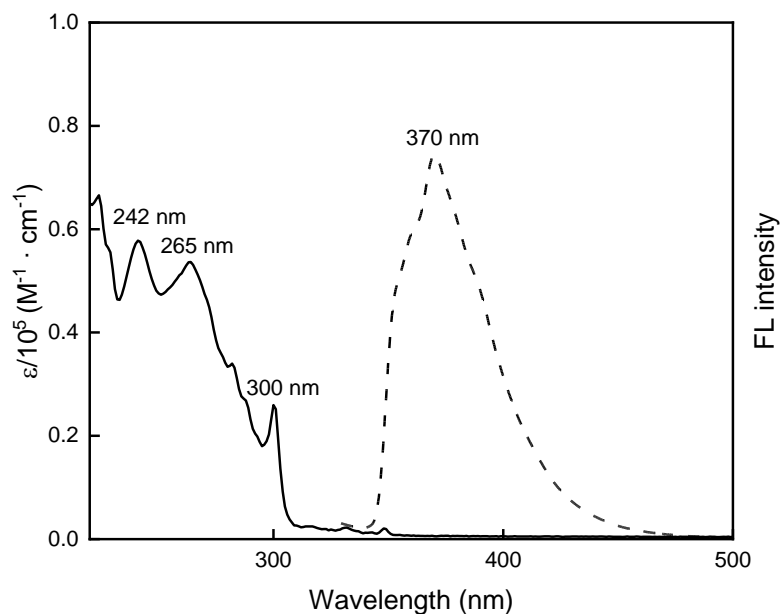

**Figure S2** UV/vis absorption spectra (solid line) and fluorescence spectra (dotted line) of SBP ( $c = 1 \times 10^{-5} M$ ) in cyclohexane.

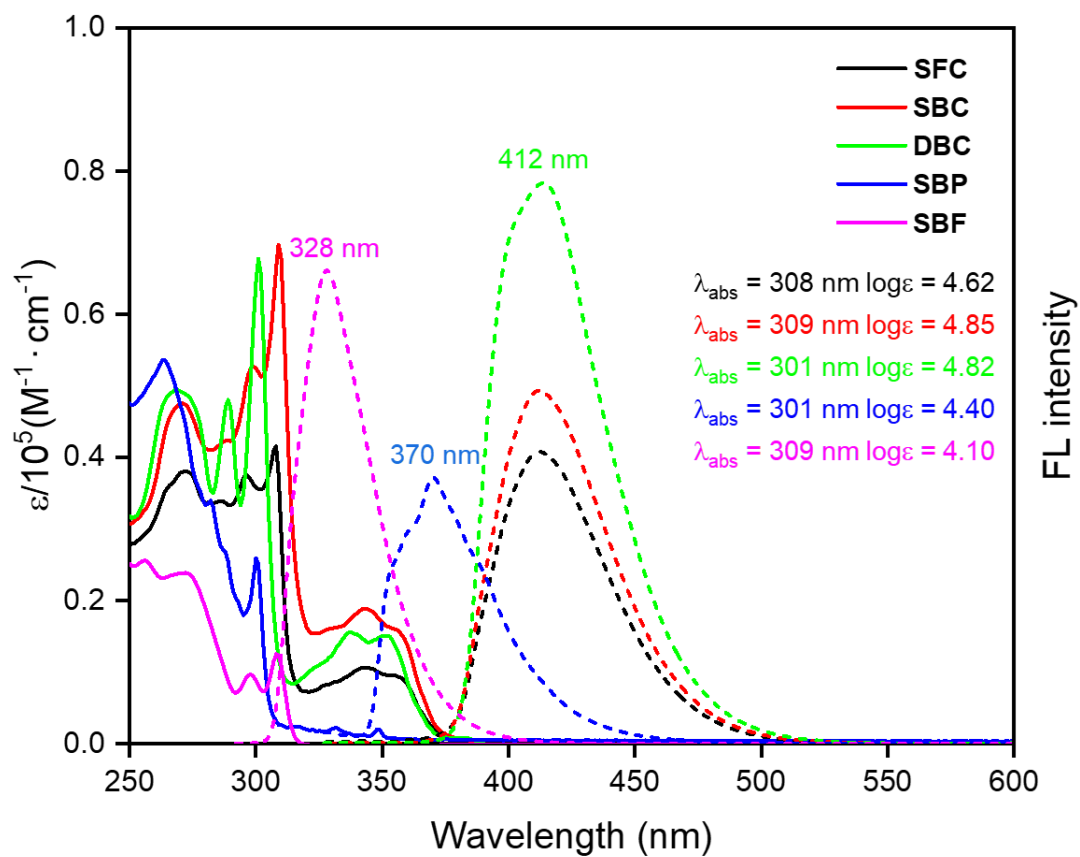

**Figure S3** UV/vis absorption (solid line) and emission (dotted line) spectra of **SFC**, **SBC**, **DBC**, **SBP** and **SBF** in cyclohexane ( $c = 1 \times 10^{-5} \text{ M}$ );



### 3.1 The comparison of **SFCs** with other model compounds.

Compared to spirofluorene compounds containing common heteroatoms, **SFCs** exhibit a smaller energy gap (Table S1). For instance, **N-SFC** and **N-SF**, which possess identical phenyl acridine groups, the larger conjugated system in **N-SFC** leads to a decrease in the energy gap. **N-SFC** incorporates a phenyl acridine donor unit, resulting in a distinctive frontier molecular orbital distribution characterized by HOMO-LUMO segregation. This segregation is accompanied by a reversible oxidation peak of  $E_{\text{onset}}^{\text{ox}} = 0.56 \text{ V}$ .

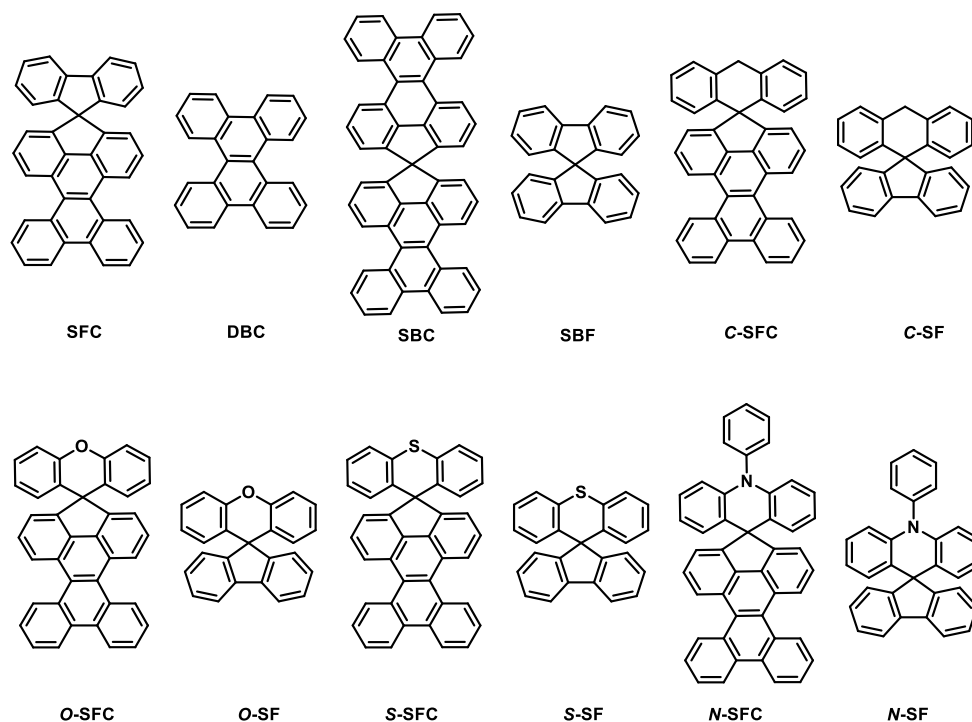

**Table S1** The comparison of **SFCs** with other model compounds.

|                         | $\lambda_{\text{abs}}$<br>(nm) <sup>a</sup> | $\lambda_{\text{em}}$ (nm) <sup>a</sup> | QY<br>(%) <sup>a</sup> | $\tau$ (ns) <sup>a</sup> | HOMO <sub>EC</sub> /<br>Theo (eV) <sup>b</sup> | LUMO <sub>EC</sub><br>/Theo<br>(eV) <sup>b</sup> | $\Delta E_{\text{EC}}/$<br>$\Delta E_{\text{Theo}}/$<br>$\Delta E_{\text{opt}}$<br>(eV) <sup>c</sup> |
|-------------------------|---------------------------------------------|-----------------------------------------|------------------------|--------------------------|------------------------------------------------|--------------------------------------------------|------------------------------------------------------------------------------------------------------|
| <b>SFC</b>              | 272, 296<br>308,344,<br>356                 | 412                                     | 7.6                    | 5.49                     | -5.75/<br>-5.35                                | -2.48/<br>-1.50                                  | 3.27/<br>3.85/<br>3.30                                                                               |
| <b>DBC</b>              | 269,289,<br>300,337,<br>352                 | 412                                     | 13.1                   |                          | -5.65 <sup>6</sup> /<br>-5.30                  | -2.49 <sup>6</sup> /<br>-1.44                    | 3.16/<br>3.86/<br>3.32                                                                               |
| <b>SBC</b>              | 271, 299<br>309, 344<br>356                 | 412                                     | 8.0                    | 5.65                     | -5.73/<br>-5.38                                | -2.51/<br>-1.54                                  | 3.22/<br>3.84/<br>3.26                                                                               |
| <b>SBF</b>              | 257,275,<br>296,308                         | 310,323                                 | 20.3                   | 4.6 <sup>7</sup>         | -5.94 <sup>7</sup> /<br>-5.99                  | -1.89 <sup>7</sup> /<br>-1.27                    | 4.05 <sup>7</sup> /<br>4.72/<br>3.97                                                                 |
| <b>C-SFC</b>            | 271,296<br>307, 344<br>354                  | 413                                     | 7.9                    | 4.64                     | -5.76/<br>-5.35                                | -2.50/<br>-1.51                                  | 3.26/<br>3.84/<br>3.28                                                                               |
| <b>C-SF</b>             |                                             |                                         |                        |                          | -/<br>-5.71                                    | -/<br>-0.82                                      | -/<br>4.89/<br>-                                                                                     |
| <b>O-SFC</b>            | 270,295,<br>306, 343<br>357                 | 413                                     | 7.4                    | 4.01                     | -2.51/<br>-1.55                                | -2.51/<br>-1.55                                  | 3.27/<br>3.84/<br>3.30                                                                               |
| <b>O-SF</b>             |                                             |                                         |                        |                          | -/<br>-5.66                                    | -/<br>-0.86                                      | -/<br>4.80/<br>-                                                                                     |
| <b>S-SFC</b>            | 271,295,<br>307, 344<br>357                 | 413                                     | 8.0                    | 5.12                     | -5.73/<br>-5.39                                | -2.50/<br>-1.56                                  | 3.23/<br>3.83/<br>3.28                                                                               |
| <b>S-SF</b>             |                                             |                                         |                        |                          | -/<br>-5.48                                    | -/<br>-0.91                                      | -/<br>4.57/<br>-                                                                                     |
| <b>N-SFC</b>            | 271, 295<br>307, 345<br>355                 | 412                                     | 7.9                    | 3.37                     | -5.36/<br>-5.17                                | -2.51/<br>-1.52                                  | 3.82/<br>3.65/<br>3.29                                                                               |
| <b>N-SF<sup>8</sup></b> | 309                                         | 429                                     |                        | 5.6                      | -5.33/<br>-4.92                                | -1.94/<br>-0.72                                  | 3.39/<br>4.20/<br>3.59                                                                               |

<sup>a</sup>Absorption, fluorescence quantum yields (QY), fluorescence lifetime ( $\tau$ ) and emission maxima measured in cyclohexane solution at room temperature. <sup>b</sup> HOMO or LUMO determined from cyclic voltammetry (EC) or theoretically calculated (Theo).  $LUMO_{\text{EC}} =$

$-e(4.8 + E_{re})$ ,  $HOMO_{EC} = -e(4.8 + E_{ox})$ . <sup>c</sup>  $\Delta E_{EC}$  calculated from the HOMO and LUMO level determined through cyclic voltammetry recorded in DMF;  $\Delta E_{Theo}$  calculated from the HOMO and LUMO level theoretically calculated;  $\Delta E_{opt}$  calculated from the onset of the absorption spectrum recorded in cyclohexane.

**Table S2** Summary of optical properties of **SFCs**

|                                      | <b>SFC</b> | <b>C-SFC</b> | <b>O-SFC</b> | <b>N-SFC</b> | <b>S-SFC</b> | <b>SBC</b> |
|--------------------------------------|------------|--------------|--------------|--------------|--------------|------------|
| $\Phi_{PL}^a$                        | 0.076      | 0.079        | 0.074        | 0.079        | 0.080        | 0.080      |
| $\tau^a$ (ns)                        | 5.49       | 4.64         | 4.01         | 3.37         | 5.12         | 5.65       |
| $k_f^b$ ( $10^8 \text{ s}^{-1}$ )    | 0.014      | 0.017        | 0.018        | 0.023        | 0.016        | 0.014      |
| $k_{nr}^c$ ( $10^8 \text{ s}^{-1}$ ) | 0.17       | 0.20         | 0.23         | 0.27         | 0.18         | 0.16       |

a. fluorescence quantum yields ( $\Phi_{PL}$ ), fluorescence lifetime ( $\tau$ ) and emission maxima measured in cyclohexane solution at room temperature; b. Radiative rate constant  $k_f$  is calculated as  $k_f = \Phi_{PL}/\tau$ ; c. Nonradiative rate constant  $k_{nr}$  is calculated as  $k_{nr} = (1-\Phi_{PL})/\tau$ .

## 4. Electrochemical data

### 4.1 SFC

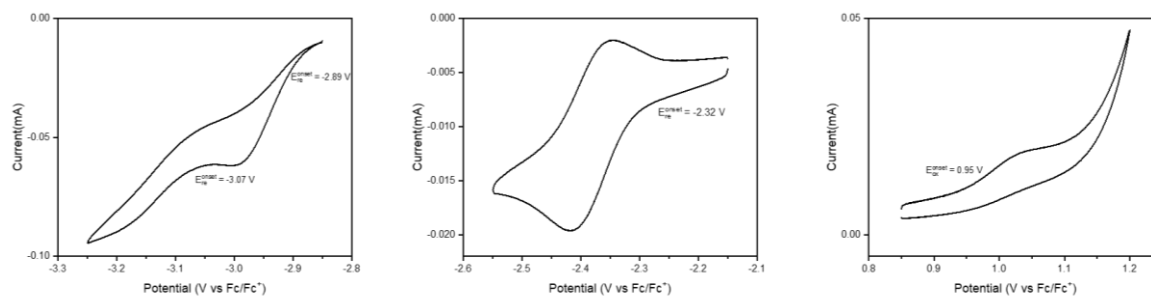

**Figure S4** Cyclic voltammogram of **SFC** in DMF solution containing 0.1 M  $n\text{-Bu}_4\text{NPF}_6$  at room temperature at a scan rate of 0.1 V/s.

### 4.2 C-SFC

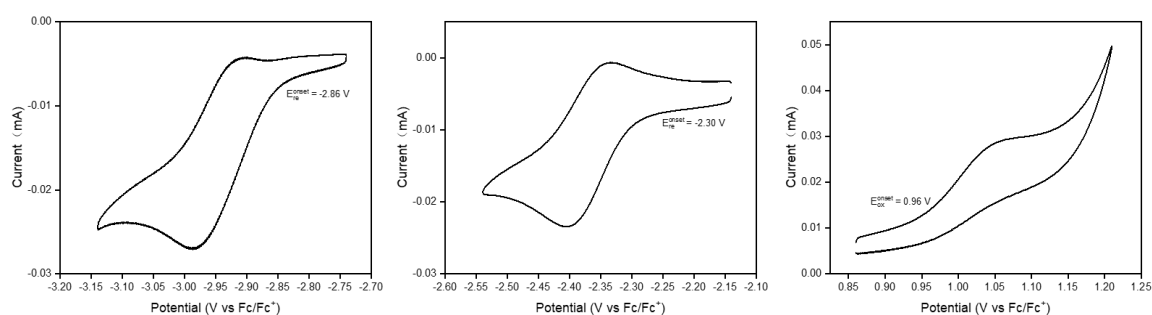

**Figure S5** Cyclic voltammogram of **C-SFC** in DMF solution containing 0.1 M  $n\text{-Bu}_4\text{NPF}_6$  at room temperature at a scan rate of 0.1 V/s.

### 4.3 O-SFC

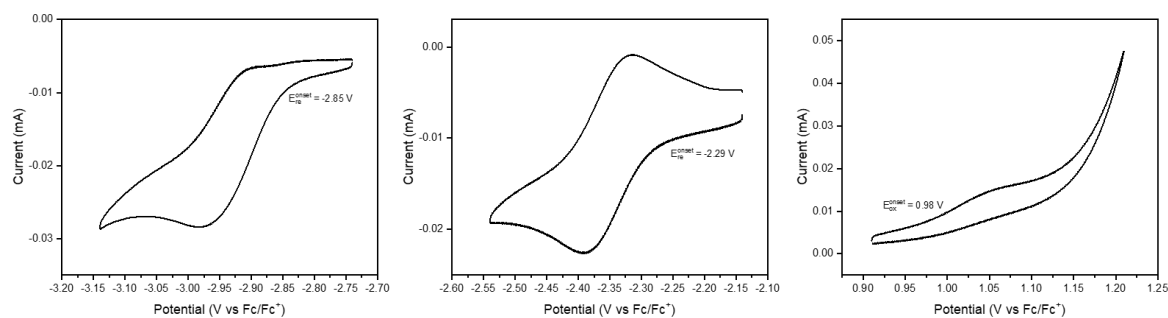

**Figure S6** Cyclic voltammogram of **O-SFC** in DMF solution containing 0.1 M  $n\text{-Bu}_4\text{NPF}_6$  at room temperature at a scan rate of 0.1 V/s.

#### 4.4 S-SFC

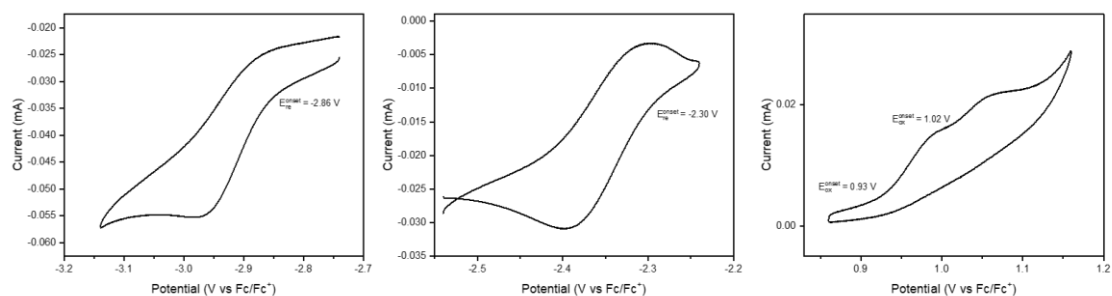

**Figure S7** Cyclic voltammogram of **S-SFC** in DMF solution containing 0.1 M  $n\text{-Bu}_4\text{NPF}_6$  at room temperature at a scan rate of 0.1 V/s.

#### 4.5 N-SFC

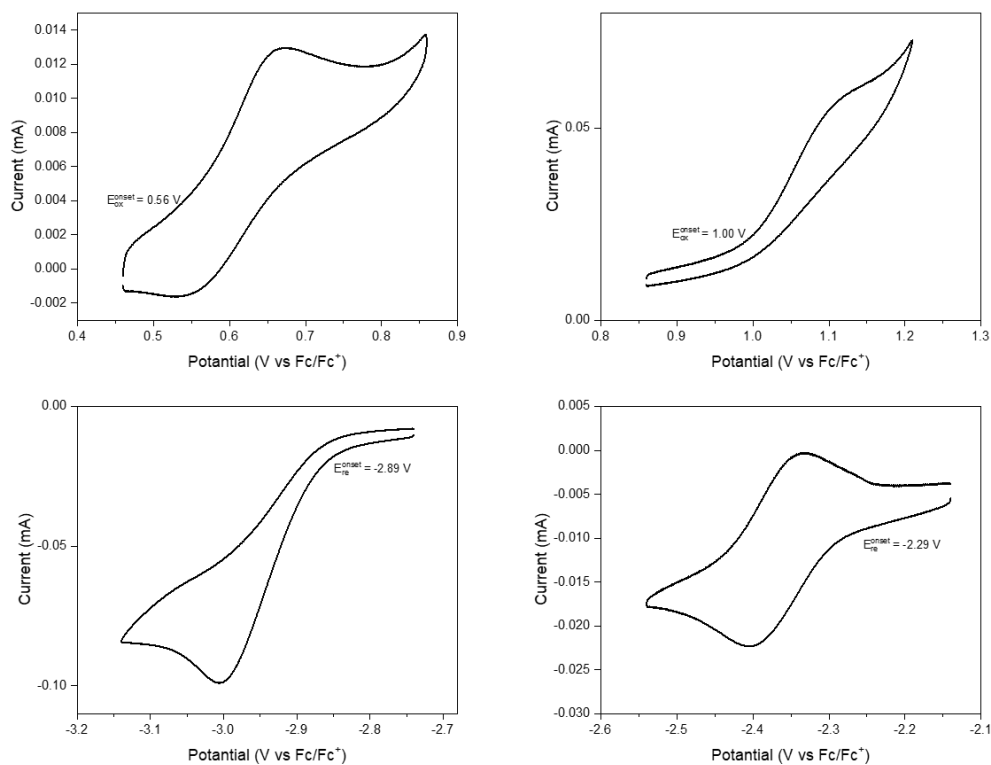

**Figure S8** Cyclic voltammogram of **N-SFC** in DMF solution containing 0.1 M  $n\text{-Bu}_4\text{NPF}_6$  at room temperature at a scan rate of 0.1 V/s.

## 4.6 SBC

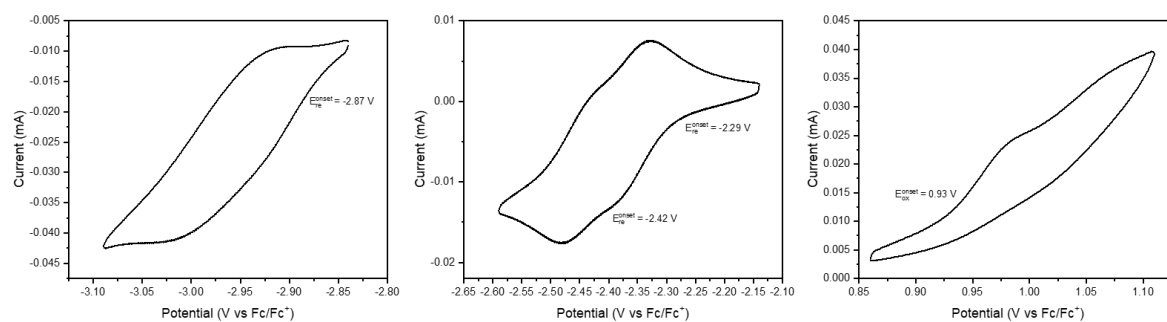

**Figure S9** Cyclic voltammogram of **SBC** in DMF solution containing 0.1 M  $n\text{-Bu}_4\text{NPF}_6$  at room temperature at a scan rate of 0.1 V/s.

## 4.7 SBP

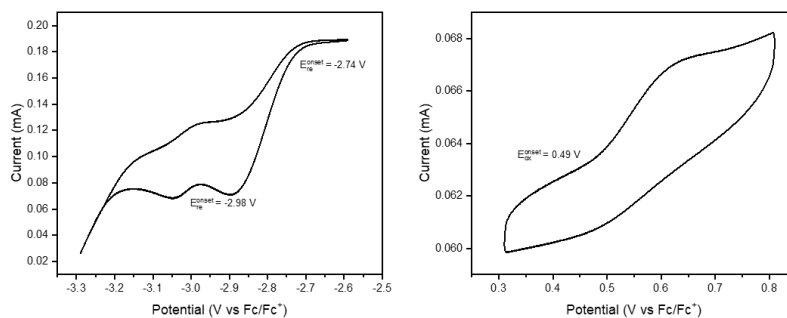

**Figure S10** Cyclic voltammogram of **SBP** in DMF solution containing 0.1 M  $n\text{-Bu}_4\text{NPF}_6$  at room temperature at a scan rate of 0.1 V/s.

## 5. Computational study

### 5.1 The TD-DFT calculation

Since the HOMO and LUMO is predominantly concentrated at the DBC, **SFCs** exhibits similar adsorption peaks to DBC. The dominant excitations for the respective compounds are clearly defined: for **SFC**, it is the transition from  $S_0 \rightarrow S_5$  (HOMO  $\rightarrow$  LUMO+1) occurring at  $\lambda = 308$  nm with an oscillator strength of  $f = 0.8111$ ; for **C-SFC**, it's the  $S_0 \rightarrow S_4$  (HOMO  $\rightarrow$  LUMO+1) transition at  $\lambda = 311$  nm with  $f = 0.7730$ ; **O-SFC** exhibits the  $S_0 \rightarrow S_5$  (HOMO  $\rightarrow$  LUMO+1) transition at  $\lambda = 311$  nm, boasting an oscillator strength of  $f = 0.8148$ ; **S-SFC** undergoes the  $S_0 \rightarrow S_5$  (HOMO  $\rightarrow$  LUMO+1) transition at  $\lambda = 312$  nm with a notably high  $f$  value of  $0.8301$ ; **SBC** displays the unique  $S_0 \rightarrow S_{11}$  (HOMO-3  $\rightarrow$  LUMO+1) transition at  $\lambda = 312$  nm, characterized by an exceptionally strong oscillator strength of  $f = 1.4379$ ; and finally, **N-SFC** shows the  $S_0 \rightarrow S_7$  (HOMO-1  $\rightarrow$  LUMO+1) transition at  $\lambda = 312$  nm with a robust oscillator strength of  $f = 0.9270$ . The molecular orbital transitions and corresponding absorption peaks align with the experimental spectra.

**Table S3** Major electronic transitions for **SFC** by TD-DFT method using B3LYP/6-31G(d).

|    | Energy<br>(eV) | Excitation<br>(nm) | Oscillator<br>strength ( $f$ ) | Description                                              |
|----|----------------|--------------------|--------------------------------|----------------------------------------------------------|
| 1  | 3.4367         | 360.77             | 0.20030                        | H $\rightarrow$ L 92.1%                                  |
| 5  | 4.0125         | 308.99             | 0.81110                        | H $\rightarrow$ L+1 49.7%, H-2 $\rightarrow$ L 41.4%     |
| 8  | 4.2348         | 292.77             | 0.11810                        | H-1 $\rightarrow$ L+1 79.0%, H-1 $\rightarrow$ L+2 6.2%  |
| 12 | 4.5027         | 275.36             | 0.29180                        | H-2 $\rightarrow$ L+1 66.1%, H-1 $\rightarrow$ L+4 12.8% |
| 15 | 4.5548         | 272.21             | 0.31160                        | H-4 $\rightarrow$ L 82.8%, H $\rightarrow$ L+4 11.1%     |

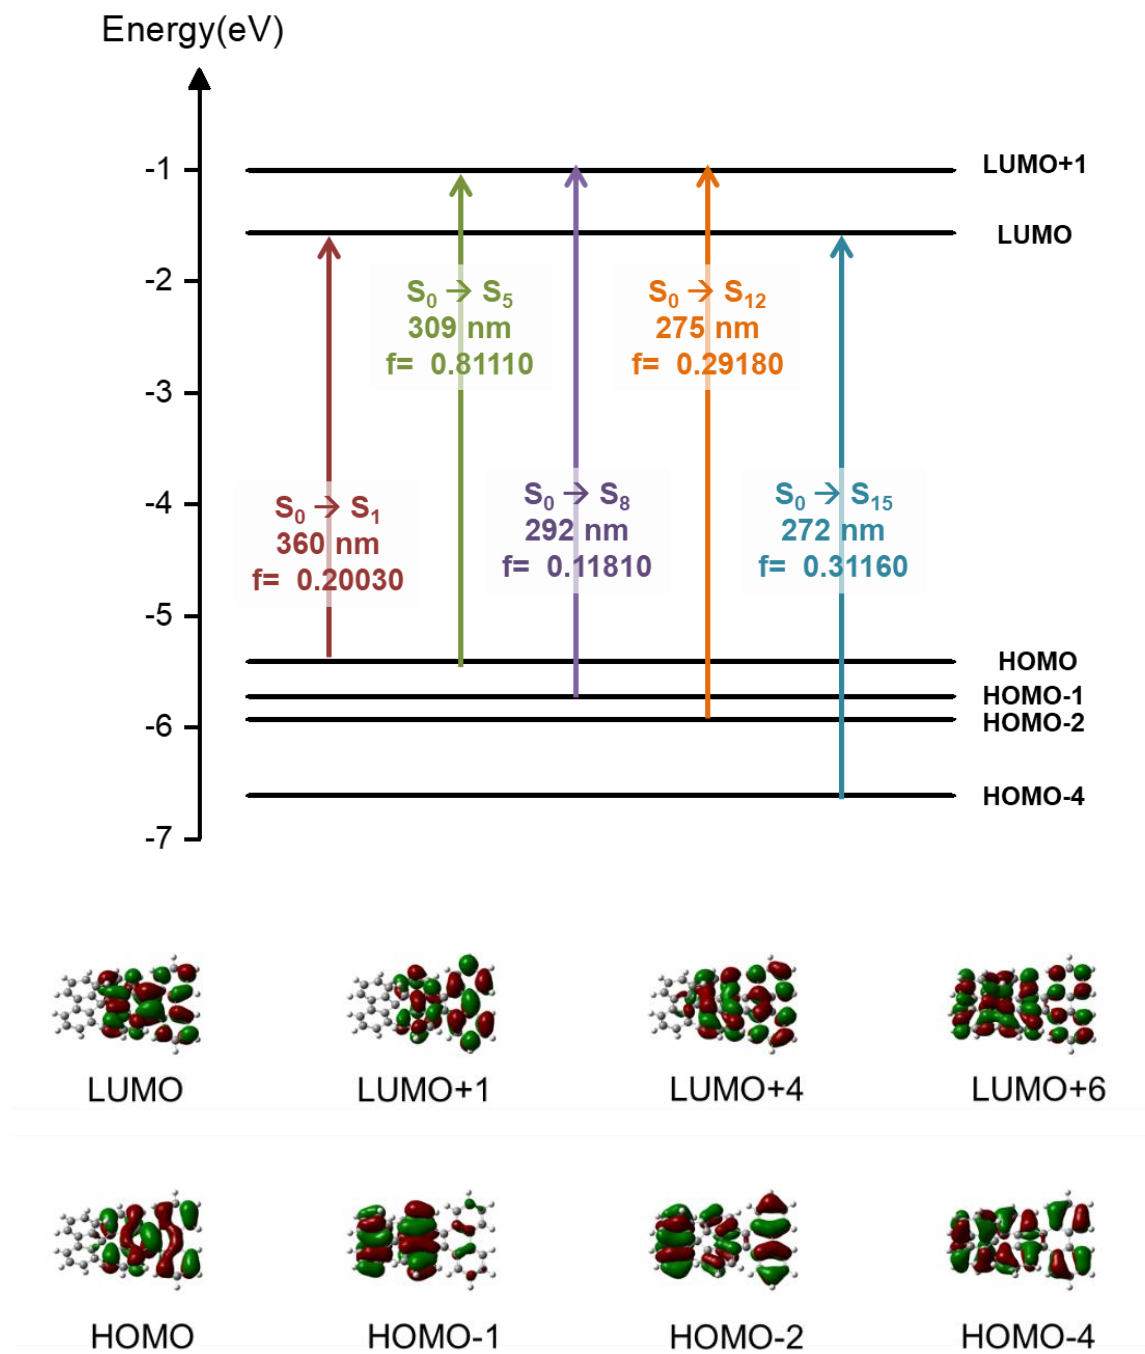

**Figure S11** Representation of the energy levels and the main molecular orbitals involved in the electronic transitions of **SFC** obtained by TD-DFT B3LYP/6-31G(d). For clarity purposes, only the major contributions (>10%) of each transition are shown.



For **C-SFC**, it's the S0→S4 (HOMO→LUMO+1) transition at  $\lambda = 311$  nm with  $f = 0.7730$ .

**Table S4** Major electronic transitions for **C-SFC** by TD-DFT method using B3LYP/6-31G(d).

|           | <b>Energy</b><br>(eV) | <b>Excitation</b><br>(nm) | <b>Oscillator</b><br><b>strength (f)</b> | <b>Description</b>                                                                                        |
|-----------|-----------------------|---------------------------|------------------------------------------|-----------------------------------------------------------------------------------------------------------|
| <b>1</b>  | 3.4313                | 361.33                    | 0.19450                                  | H -> L 92.1%, H-1 -> L+1 5.5%                                                                             |
| <b>4</b>  | 3.9780                | 311.67                    | 0.77300                                  | H -> L+1 44.6%, H-1 -> L 22.2%,<br>H -> L+2 22.0%, H-2 -> L 6.4%                                          |
| <b>7</b>  | 4.2934                | 288.78                    | 0.18140                                  | H-1 -> L+1 76.9%, H-2 -> L+1 8.3%                                                                         |
| <b>10</b> | 4.4591                | 278.05                    | 0.28070                                  | H-4 -> L 66.4%, H -> L+3 16.6%,<br>H-1 -> L+2 7.8%                                                        |
| <b>12</b> | 4.5184                | 274.40                    | 0.13040                                  | H-2 -> L+1 38.5%, H-5 -> L 31.1%,<br>H-1 -> L+1 7.2%, H-7 -> L 5.7%                                       |
| <b>18</b> | 4.8467                | 255.81                    | 0.10420                                  | H-8 -> L 62.1%, H -> L+5 6.4%,<br>H-2 -> L+2 6.2%, H-7 -> L 5.7%,<br>H-2 -> L+1 5.5%                      |
| <b>20</b> | 4.8708                | 254.55                    | 0.15450                                  | H-8 -> L 26.5%, H -> L+5 18.0%,<br>H-2 -> L+1 12.6%, H-7 -> L 11.3%,<br>H-2 -> L+2 10.5%, H-4 -> L+1 9.5% |

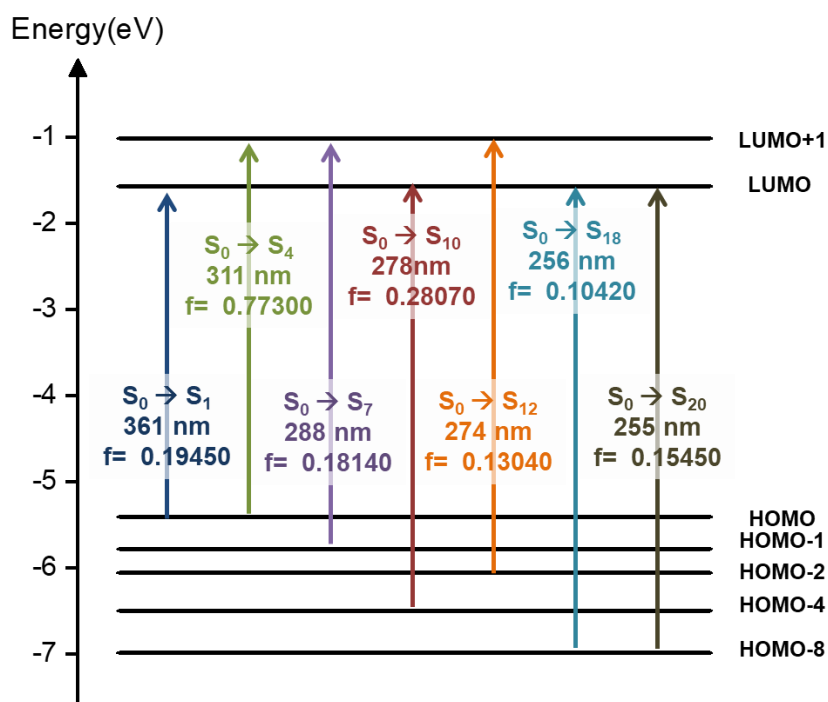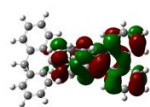

HOMO

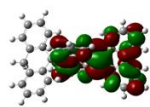

LUMO

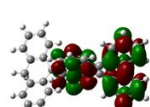

LUMO+1

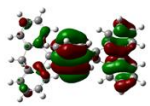

HOMO-1

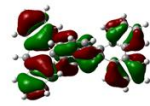

HOMO-4

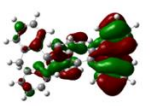

HOMO-2

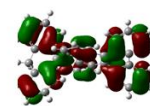

HOMO-8

**Figure S12** Representation of the energy levels and the main molecular orbitals involved in the electronic transitions of **C-SFC** obtained by TD-DFT B3LYP/6-31G(d). For clarity purposes, only the major contributions (>10%) of each transition are shown.

For **O-SFC** exhibits the S0→S5 (HOMO→LUMO+1) transition at  $\lambda = 311$  nm, boasting an oscillator strength of  $f = 0.8148$ ;

**Table S5** Major electronic transitions for **O-SFC** by TD-DFT method using B3LYP/6-31G(d).

|           | <b>Energy</b><br>(eV) | <b>Excitation</b><br>(nm) | <b>Oscillator</b><br><b>strength (f)</b> | <b>Description</b>                                               |
|-----------|-----------------------|---------------------------|------------------------------------------|------------------------------------------------------------------|
| <b>1</b>  | 3.4333                | 361.12                    | 0.19830                                  | H -> L 92.2%, H-2 -> L+1 5.5%                                    |
| <b>5</b>  | 3.9847                | 311.15                    | 0.81480                                  | H -> L+1 47.8%, H-2 -> L 22.8%,<br>H -> L+2 18.5%, H-3 -> L 6.5% |
| <b>9</b>  | 4.3156                | 287.29                    | 0.18230                                  | H-2 -> L+1 74.8%, H-3 -> L+1 9.7%                                |
| <b>13</b> | 4.5062                | 275.14                    | 0.29310                                  | H-4 -> L 64.4%, H -> L+3 14.7%,<br>H -> L+4 12.5%                |
| <b>14</b> | 4.5101                | 274.90                    | 0.19680                                  | H-3 -> L+1 49.7%, H -> L+5 19.8%,<br>H-2 -> L+1 13.0%            |

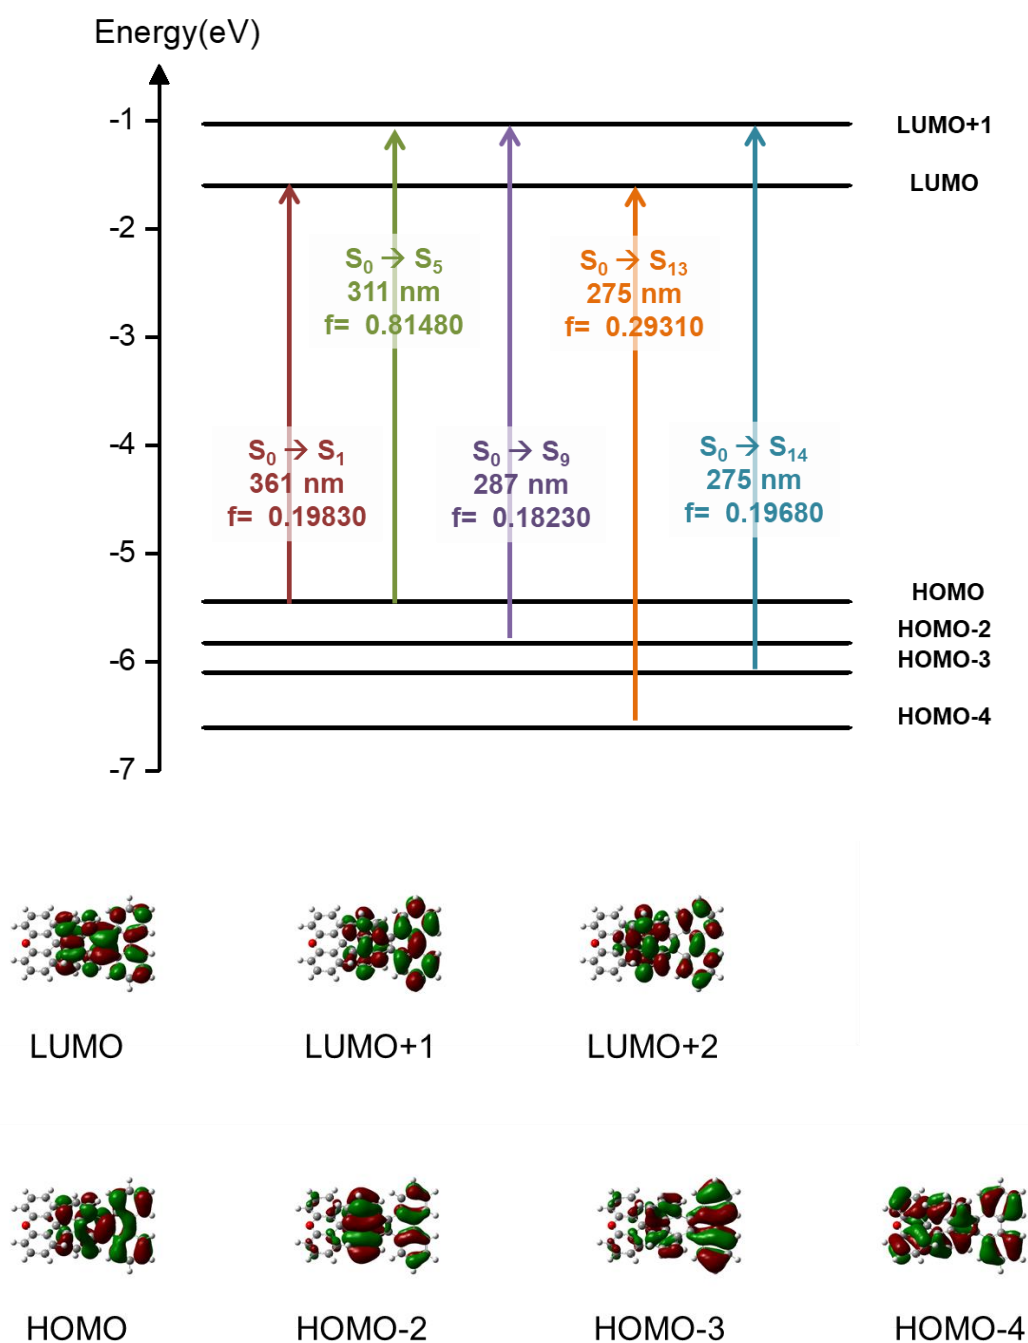

**Figure S13** Representation of the energy levels and the main molecular orbitals involved in the electronic transitions of **O-SFC** obtained by TD-DFT B3LYP/6-31G(d). For clarity purposes, only the major contributions (>10%) of each transition are shown.

**N-SFC** shows the S0→S7 (HOMO-1→LUMO+1) transition at  $\lambda = 312$  nm with a robust oscillator strength of  $f = 0.9270$ .

**Table S6** Major electronic transitions for **N-SFC** by TD-DFT method using B3LYP/6-31G(d).

|           | Energy<br>(eV) | Excitation<br>(nm) | Oscillator<br>strength ( <i>f</i> ) | Description                                                         |
|-----------|----------------|--------------------|-------------------------------------|---------------------------------------------------------------------|
| <b>1</b>  | 3.2351         | 383.25             | 0.00020                             | H -> L 99.3%                                                        |
| <b>2</b>  | 3.4301         | 361.46             | 0.18680                             | H-1 -> L 92.1%, H-2 -> L+1 5.7%                                     |
| <b>7</b>  | 3.9674         | 312.51             | 0.92700                             | H-1 -> L+1 49.2%, H-2 -> L 26.8%,<br>H-1 -> L+2 14.4%               |
| <b>11</b> | 4.1758         | 296.91             | 0.17950                             | H -> L+5 57.5%, H -> L+4 23.8%,<br>H -> L+3 7.4%                    |
| <b>13</b> | 4.3316         | 286.23             | 0.19110                             | H-2 -> L+1 70.5%, H-3 -> L+1 10.2%,<br>H-2 -> L+2 8.4%              |
| <b>16</b> | 4.4835         | 276.53             | 0.25730                             | H-4 -> L 61.2%, H-3 -> L+1 11.5%,<br>H-1 -> L+3 10.4%               |
| <b>18</b> | 4.5262         | 273.93             | 0.15070                             | H-3 -> L+1 49.9%, H-4 -> L 13.6%,<br>H-2 -> L+1 6.6%, H-8 -> L 5.6% |

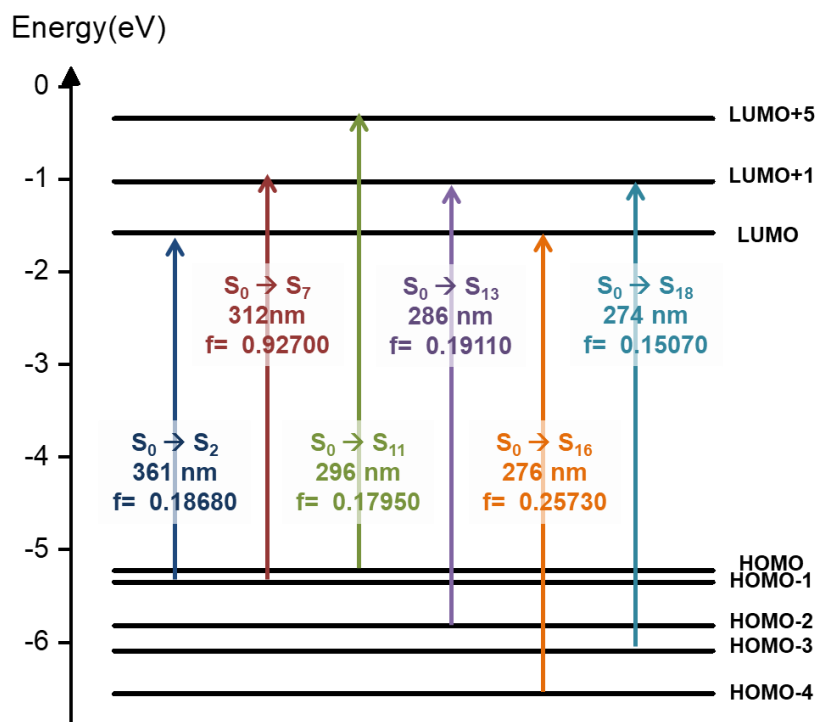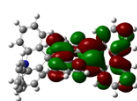

LUMO

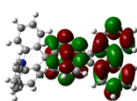

LUMO+1

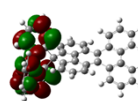

LUMO+5

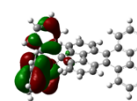

HOMO

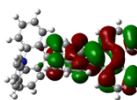

HOMO-1

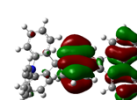

HOMO-2

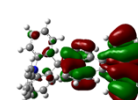

HOMO-3

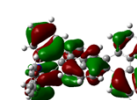

HOMO-4

**Figure S14** Representation of the energy levels and the main molecular orbitals involved in the electronic transitions of **N-SFC** obtained by TD-DFT B3LYP/6-31G(d). For clarity purposes, only the major contributions (>10%) of each transition are shown.

**SBC** displays the unique  $S_0 \rightarrow S_{11}$  (HOMO-3  $\rightarrow$  LUMO+1) transition at  $\lambda = 312$  nm, characterized by an exceptionally strong oscillator strength of  $f = 1.4379$ ;

**Table S7** Major electronic transitions for **SBC** by TD-DFT method using B3LYP/6-31G(d).

|           | Energy<br>(eV) | Excitation<br>(nm) | Oscillator<br>strength ( $f$ ) | Description                                                                                                                                                                                               |
|-----------|----------------|--------------------|--------------------------------|-----------------------------------------------------------------------------------------------------------------------------------------------------------------------------------------------------------|
| <b>1</b>  | 3.4316         | 361.30             | 0.26800                        | H $\rightarrow$ L 76.7%, H-1 $\rightarrow$ L+1 16.2%                                                                                                                                                      |
| <b>7</b>  | 3.7095         | 334.23             | 0.13400                        | H-2 $\rightarrow$ L 27.4%, H-4 $\rightarrow$ L 22.2%,<br>H $\rightarrow$ L+3 14.0%, H-3 $\rightarrow$ L+1 11.1%,<br>H-1 $\rightarrow$ L+2 8.6%, H-1 $\rightarrow$ L+4 6.6%                                |
| <b>10</b> | 3.8924 eV      | 318.53             | 0.31150                        | H-1 $\rightarrow$ L+4 23.3%, H-2 $\rightarrow$ L 17.4%,<br>H $\rightarrow$ L+5 17.0%, H-5 $\rightarrow$ L+1 14.8%,<br>H-4 $\rightarrow$ L 8.7%, H-1 $\rightarrow$ L+2 8.4%,<br>H-3 $\rightarrow$ L+1 7.2% |
| <b>11</b> | 3.9740         | 311.99             | 1.43790                        | H-3 $\rightarrow$ L+1 55.5%, H-1 $\rightarrow$ L+2 22.3%,<br>H $\rightarrow$ L+3 17.6%                                                                                                                    |
| <b>20</b> | 4.2420         | 292.28             | 0.10360                        | H-2 $\rightarrow$ L+2 79.5%, H-2 $\rightarrow$ L+4 7.9%                                                                                                                                                   |

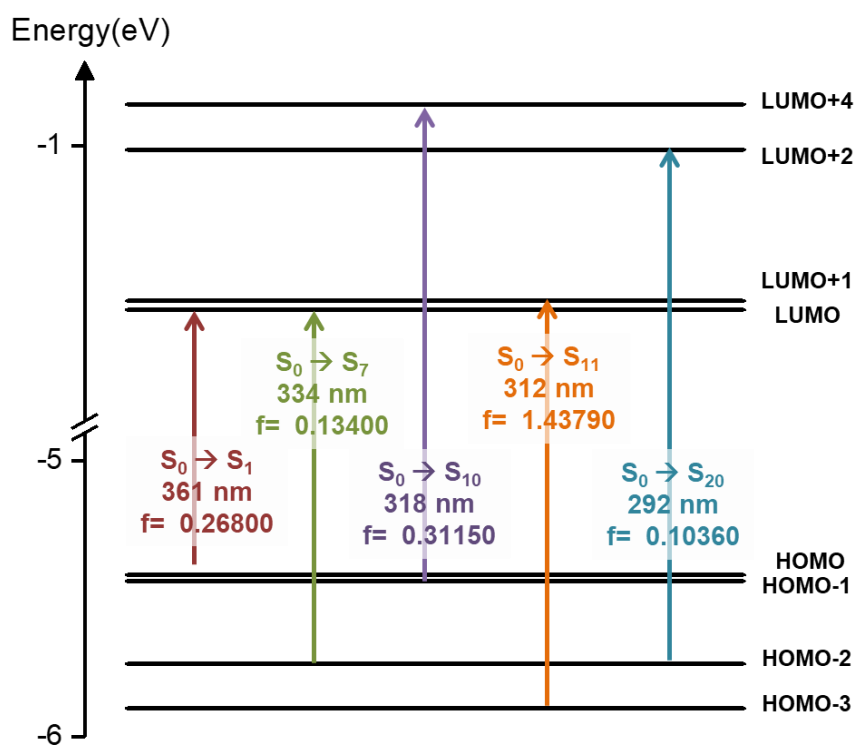

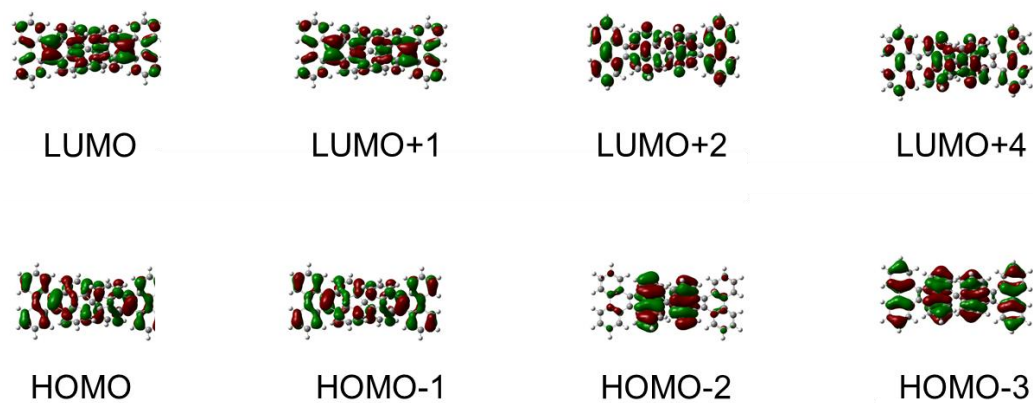

**Figure S15** Representation of the energy levels and the main molecular orbitals involved in the electronic transitions of **SBC** obtained by TD-DFT B3LYP/6-31G(d). For clarity purposes, only the major contributions (>10%) of each transition are shown.



**S-SFC** undergoes the S0→S5 (HOMO→LUMO+1) transition at  $\lambda = 312$  nm with a notably high  $f$  value of 0.8301.

**Table S8** Major electronic transitions for **S-SFC** by TD-DFT method using B3LYP/6-31G(d).

|           | <b>Energy</b><br>(eV) | <b>Excitation</b><br>(nm) | <b>Oscillator</b><br><b>strength (f)</b> | <b>Description</b>                                                                                     |
|-----------|-----------------------|---------------------------|------------------------------------------|--------------------------------------------------------------------------------------------------------|
| <b>1</b>  | 3.4254                | 361.96                    | 0.18850                                  | H -> L 92.0%, H-2 -> L+1 5.7%                                                                          |
| <b>5</b>  | 3.9648                | 312.71                    | 0.83010                                  | H -> L+1 52.8%, H-2 -> L 28.7%,<br>H -> L+2 13.0%                                                      |
| <b>10</b> | 4.3309                | 286.28                    | 0.17160                                  | H-2 -> L+1 64.8%, H-2 -> L+2 11.9%,<br>H-3 -> L+1 11.5%                                                |
| <b>11</b> | 4.4152                | 280.81                    | 0.10170                                  | H-2 -> L+2 67.8%, H-2 -> L+1 10.9%,<br>H -> L+5 6.0%                                                   |
| <b>14</b> | 4.4808                | 276.70                    | 0.19090                                  | H-4 -> L 25.6%, H-3 -> L+1 22.9%,<br>H-2 -> L+1 9.5%, H-1 -> L+3 9.2%,<br>H -> L+5 7.3%, H -> L+3 5.9% |
| <b>15</b> | 4.5245                | 274.03                    | 0.18760                                  | H-4 -> L 42.8%, H-3 -> L+1 22.7%,<br>H -> L+5 14.8%                                                    |

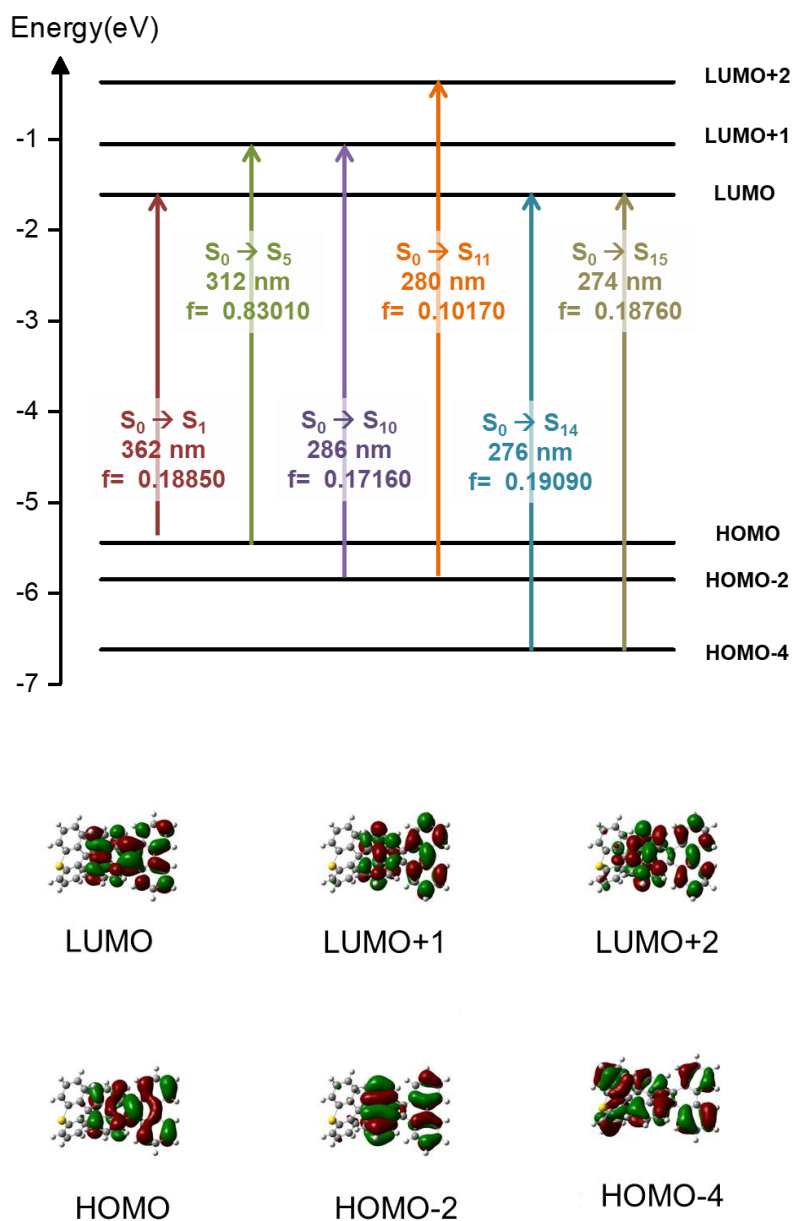

**Figure S16** Representation of the energy levels and the main molecular orbitals involved in the electronic transitions of **S-SFC** obtained by TD-DFT B3LYP/6-31G(d). For clarity purposes, only the major contributions (>10%) of each transition are shown.

**Table S9** Major electronic transitions for **SBP** by TD-DFT method using B3LYP/6-31G(d).

|           | <b>Energy</b> | <b>Excitation</b> | <b>Oscillator</b>   | <b>Description</b>                                      |
|-----------|---------------|-------------------|---------------------|---------------------------------------------------------|
|           | <b>(eV)</b>   | <b>(nm)</b>       | <b>strength (f)</b> |                                                         |
| <b>9</b>  | 4.4853        | 276.42            | 0.11150             | H -> L+3 80.5%, H-3 -> L+3 7.4%                         |
| <b>10</b> | 4.4853        | 276.42            | 0.11140             | H -> L+2 80.5%, H-3 -> L+2 7.4%                         |
| <b>13</b> | 4.6534        | 266.44            | 0.45260             | H-3 -> L+1 45.5%, H-1 -> L+3 21.8%,<br>H-2 -> L+2 21.8% |
| <b>15</b> | 4.8412        | 256.10            | 0.11210             | H-3 -> L+3 61.8%, H -> L+5 25.9%,<br>H-3 -> L+5 5.4%    |
| <b>16</b> | 4.8412        | 256.10            | 0.11200             | H-3 -> L+2 61.8%, H -> L+4 25.9%,<br>H-3 -> L+4 5.4%    |
| <b>19</b> | 5.0887        | 243.65            | 0.35450             | H -> L+5 47.3%, H-3 -> L+3 23.3%,<br>H-4 -> L+3 14.5%   |
| <b>20</b> | 5.0887        | 243.65            | 0.35430             | H -> L+4 47.3%, H-3 -> L+2 23.3%,<br>H-4 -> L+2 14.5%   |

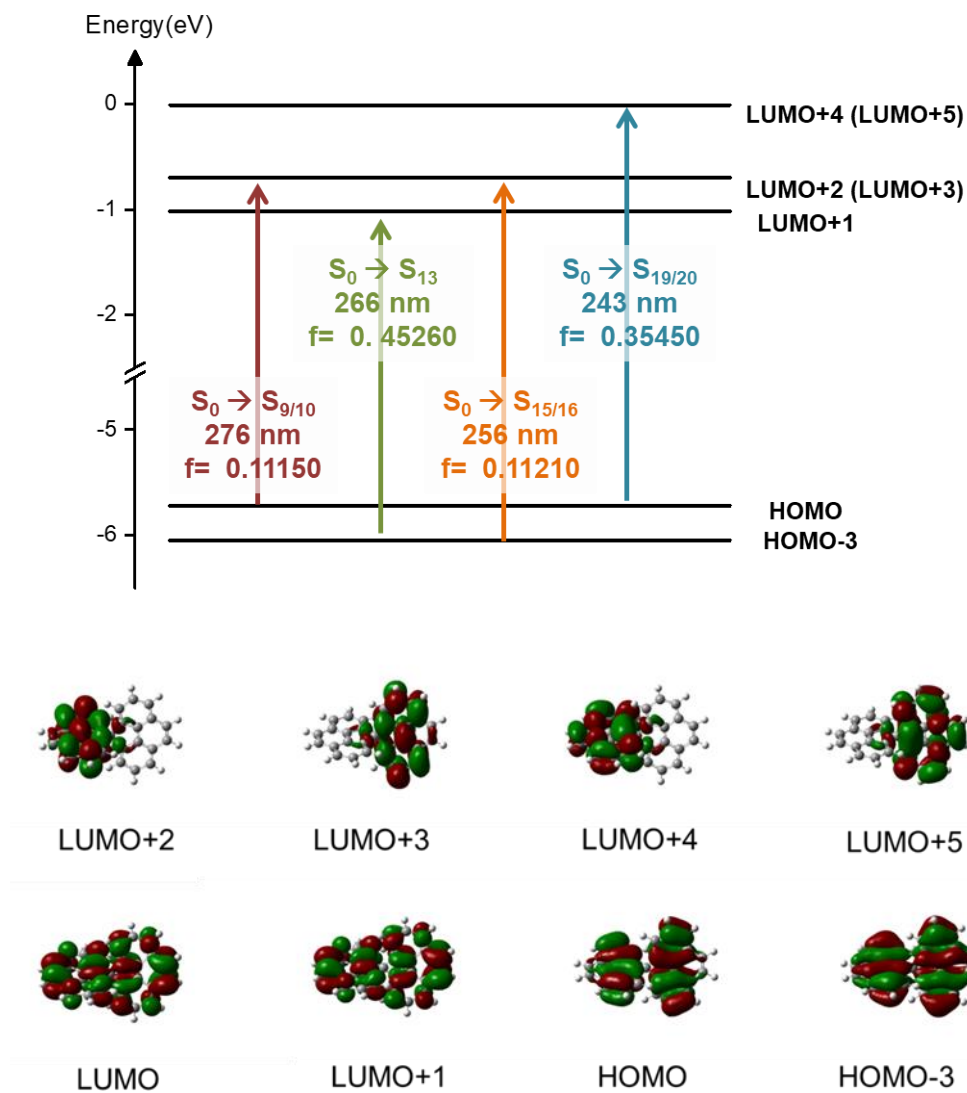

**Figure S17** Representation of the energy levels and the main molecular orbitals involved in the electronic transitions of **SBP** obtained by TD-DFT B3LYP/6-31G(d). For clarity purposes, only the major contributions (>10%) of each transition are shown.

## 5.2 Cartesian coordinates of optimized structures

**Table S10** Cartesian coordinates of optimized structures calculated by B3LYP/6-31G(d)

(SFC, C-SFC, O-SFC, S-SFC, N-SFC, SBC, SBP).

| SFC |             |             |             |   |             |             |             |
|-----|-------------|-------------|-------------|---|-------------|-------------|-------------|
| C   | 1.68735900  | 2.15621400  | 1.39510300  | C | -3.51083700 | -2.82732900 | -0.19434700 |
| C   | 1.50788500  | 1.01069800  | 0.64348000  | C | -4.69068300 | -3.54124500 | -0.08258100 |
| C   | 0.19534200  | 0.60706700  | 0.36029700  | C | -5.91099100 | -2.86186700 | 0.03684600  |
| C   | -0.97848900 | 1.28543900  | 0.69886600  | C | -5.91801700 | -1.47941100 | 0.07682100  |
| C   | -0.76454400 | 2.42742300  | 1.51738600  | C | -5.91801100 | 1.47941700  | -0.07681600 |
| C   | 0.52863600  | 2.83115200  | 1.84565100  | C | -5.91098000 | 2.86187300  | -0.03684600 |
| C   | 0.19534200  | -0.60709000 | -0.36026200 | C | -4.69066900 | 3.54124700  | 0.08257900  |
| C   | -0.97849000 | -1.28545300 | -0.69884800 | C | -3.51082500 | 2.82732600  | 0.19434700  |
| C   | -2.23158400 | -0.66687700 | -0.24076300 | H | 2.67411400  | 2.52707300  | 1.65781100  |
| C   | -2.23158200 | 0.66686900  | 0.24077300  | H | -1.59747300 | 2.97773600  | 1.93780600  |
| C   | 1.50788500  | -1.01072300 | -0.64344200 | H | 0.64993400  | 3.70448000  | 2.48125600  |
| C   | 1.68735900  | -2.15623400 | -1.39507300 | H | 2.67411400  | -2.52709500 | -1.65777800 |
| C   | 0.52863600  | -2.83116300 | -1.84563400 | H | 0.64993500  | -3.70448800 | -2.48124300 |
| C   | -0.76454500 | -2.42743000 | -1.51737700 | H | -1.59747300 | -2.97773400 | -1.93780900 |
| C   | 2.48724800  | -0.00001000 | 0.00001500  | H | 6.87733600  | 0.70837600  | -1.10494500 |
| C   | 3.45725400  | -0.64091400 | 0.99673000  | H | 6.36040100  | 2.02093300  | -3.14874100 |
| C   | 4.79124400  | -0.39708300 | 0.61807600  | H | 4.01111700  | 2.44588500  | -3.80860100 |
| C   | 4.79122100  | 0.39710400  | -0.61811200 | H | 2.13644100  | 1.56300600  | -2.43169000 |
| C   | 3.45721700  | 0.64091400  | -0.99673100 | H | 2.13653100  | -1.56302700 | 2.43172500  |
| C   | 5.84447800  | 0.89203500  | -1.38987300 | H | 4.01125900  | -2.44587500 | 3.80858700  |
| C   | 5.55048100  | 1.62981300  | -2.53871200 | H | 6.36051800  | -2.02088500 | 3.14866400  |
| C   | 4.22340600  | 1.87011800  | -2.91184000 | H | 6.87737700  | -0.70832200 | 1.10485300  |
| C   | 3.16640800  | 1.37525900  | -2.14005500 | H | -2.57653100 | -3.37161100 | -0.20529900 |
| C   | 3.16648800  | -1.37526300 | 2.14006300  | H | -4.66271900 | -4.62725000 | -0.05859900 |
| C   | 4.22351500  | -1.87010500 | 2.91182000  | H | -6.84186400 | -3.41383100 | 0.13336800  |
| C   | 5.55057500  | -1.62977900 | 2.53865700  | H | -6.86112700 | -0.96791800 | 0.23384200  |
| C   | 5.84453000  | -0.89199700 | 1.38980900  | H | -6.86112300 | 0.96792700  | -0.23383400 |
| C   | -3.49099300 | -1.41006800 | -0.20925100 | H | -6.84185000 | 3.41384000  | -0.13336800 |
| C   | -4.72845000 | -0.72709700 | -0.03531900 | H | -4.66270000 | 4.62725100  | 0.05859200  |
| C   | -4.72844700 | 0.72709800  | 0.03532600  | H | -2.57651700 | 3.37160300  | 0.20529900  |
| C   | -3.49098900 | 1.41006400  | 0.20925600  |   |             |             |             |

C-SFC

|   |             |             |             |   |             |             |             |
|---|-------------|-------------|-------------|---|-------------|-------------|-------------|
| C | -1.56196700 | 2.05800100  | 1.69696100  | C | 3.46106000  | -2.84050600 | -0.55979200 |
| C | -1.43004000 | 1.00334400  | 0.81254600  | C | 4.62091600  | -3.59478000 | -0.55234200 |
| C | -0.13483000 | 0.60193400  | 0.45878900  | C | 5.86221200  | -2.96781900 | -0.37646300 |
| C | 1.06423500  | 1.20499200  | 0.85139300  | C | 5.91060900  | -1.60013400 | -0.17645500 |
| C | 0.89742400  | 2.24778800  | 1.80212900  | C | 5.99527000  | 1.35552700  | 0.01468200  |
| C | -0.37799900 | 2.64474700  | 2.20120500  | C | 6.02934100  | 2.72353800  | 0.21547100  |
| C | -0.18122900 | -0.51751500 | -0.40018000 | C | 4.83135300  | 3.41747600  | 0.43462500  |
| C | 0.96863100  | -1.18050400 | -0.83782200 | C | 3.63282000  | 2.72795900  | 0.48340700  |
| C | 2.24552000  | -0.65494000 | -0.33270000 | H | -2.53351400 | 2.42138200  | 2.01999500  |
| C | 2.29185300  | 0.61240800  | 0.30108200  | H | 1.75313600  | 2.72233100  | 2.26689500  |
| C | -1.50887100 | -0.84949900 | -0.70483800 | H | -0.46366000 | 3.44032600  | 2.93685400  |
| C | -1.72706100 | -1.89210600 | -1.58513100 | H | -2.72469800 | -2.20748100 | -1.87707200 |
| C | -0.59436700 | -2.53802000 | -2.13394600 | H | -0.74970500 | -3.32497400 | -2.86749700 |
| C | 0.71358200  | -2.21075600 | -1.78275600 | H | 1.52552300  | -2.72731600 | -2.27999500 |
| C | -2.45954900 | 0.10777500  | 0.07924800  | H | -6.40451300 | -2.08026300 | 1.43316400  |
| C | -3.31970100 | 0.92811900  | -0.89886800 | H | -5.41817200 | -2.81852500 | 3.58437100  |
| C | -4.63844900 | 0.55095000  | -1.19189000 | H | -3.05759200 | -2.20632200 | 4.12681800  |
| C | -4.63390600 | -1.06256600 | 0.76086400  | H | -1.74480500 | -0.85711200 | 2.53884200  |
| C | -3.31517700 | -0.70043500 | 1.07167600  | H | -1.75414000 | 2.34272900  | -1.33670400 |
| C | -5.37722000 | -1.81803500 | 1.67820000  | H | -3.07540300 | 3.64317400  | -2.95746200 |
| C | -4.82541300 | -2.23439300 | 2.88547600  | H | -5.43596800 | 2.98890100  | -3.44831900 |
| C | -3.50695800 | -1.88958700 | 3.18945200  | H | -6.41344900 | 1.01353700  | -2.31344500 |
| C | -2.76574200 | -1.12855700 | 2.29034600  | H | -5.16454500 | -1.52205600 | -1.26032300 |
| C | -2.77526200 | 2.04511100  | -1.55196100 | H | -6.33412500 | -0.52391400 | -0.43305600 |
| C | -3.52123000 | 2.78187000  | -2.46725200 | H | 2.51089500  | -3.35354200 | -0.61727200 |
| C | -4.83957800 | 2.41487000  | -2.74416900 | H | 4.56133000  | -4.67502200 | -0.65385300 |
| C | -5.38639100 | 1.30667400  | -2.10521200 | H | 6.77776100  | -3.55269800 | -0.36114400 |
| C | -5.25491300 | -0.67491700 | -0.56027100 | H | 6.87049600  | -1.13658700 | 0.02235400  |
| C | 3.48288000  | -1.43115100 | -0.41002000 | H | 6.92056400  | 0.84015300  | -0.21765500 |
| C | 4.74222500  | -0.80739200 | -0.17962000 | H | 6.97454300  | 3.25722700  | 0.16754700  |
| C | 4.78595600  | 0.62813200  | 0.05959100  | H | 4.83481600  | 4.49922900  | 0.53758300  |
| C | 3.57165800  | 1.31975100  | 0.33380100  | H | 2.71507300  | 3.29270400  | 0.57383400  |

O-SFC

|   |             |             |             |   |             |             |             |
|---|-------------|-------------|-------------|---|-------------|-------------|-------------|
| C | -1.63249200 | 1.95211100  | 1.66937800  | C | 3.54520900  | 1.37035000  | 0.39324600  |
| C | -1.45326700 | 0.91657600  | 0.77255400  | C | 3.56507000  | -2.77709900 | -0.56513500 |
| C | -0.14157300 | 0.55413800  | 0.43772700  | C | 4.74492900  | -3.49950400 | -0.54796900 |
| C | 1.03288600  | 1.18164800  | 0.86260300  | C | 5.96513700  | -2.84176000 | -0.33969300 |
| C | 0.81917700  | 2.20491200  | 1.82546500  | C | 5.97220600  | -1.47658700 | -0.11803300 |
| C | -0.47389000 | 2.56150600  | 2.20526000  | C | 5.97210800  | 1.47683700  | 0.11821200  |
| C | -0.14152200 | -0.55427600 | -0.43781500 | C | 5.96494200  | 2.84200800  | 0.33987800  |
| C | 1.03299600  | -1.18170000 | -0.86266800 | C | 4.74468300  | 3.49967500  | 0.54809600  |
| C | 2.28598500  | -0.62932400 | -0.32653800 | C | 3.56486800  | 2.77719600  | 0.56519700  |
| C | 2.28593000  | 0.62934700  | 0.32652800  | H | -2.61935700 | 2.28477800  | 1.97924400  |
| C | -1.45318200 | -0.91677300 | -0.77271300 | H | 1.65239200  | 2.69484600  | 2.31445900  |
| C | -1.63229500 | -1.95229100 | -1.66958200 | H | -0.59467800 | 3.34270300  | 2.95126800  |
| C | -0.47363600 | -2.56160000 | -2.20543600 | H | -2.61912600 | -2.28499800 | -1.97951500 |
| C | 0.81939400  | -2.20493800 | -1.82557700 | H | -0.59434500 | -3.34277400 | -2.95148000 |
| C | -2.44290000 | -0.00014100 | -0.00010900 | H | 1.65266000  | -2.69480100 | -2.31455500 |
| C | -3.31424900 | 0.81492300  | -0.95814000 | H | -6.58180500 | -1.43990800 | 1.69550300  |
| C | -4.70983700 | 0.76823400  | -0.90302000 | H | -5.51517100 | -2.90340600 | 3.41880200  |
| C | -4.70981400 | -0.76807900 | 0.90322700  | H | -3.02211700 | -3.01900000 | 3.55514600  |
| C | -3.31422500 | -0.81519400 | 0.95795500  | H | -1.64734500 | -1.69088900 | 1.98984300  |
| C | -5.50247600 | -1.51479500 | 1.78300300  | H | -1.64739400 | 1.68998700  | -1.99060300 |
| C | -4.89937600 | -2.32429700 | 2.73633300  | H | -3.02220100 | 3.01842400  | -3.55559800 |
| C | -3.50338000 | -2.38920800 | 2.81273200  | H | -5.51525100 | 2.90373000  | -3.41843200 |
| C | -2.73102200 | -1.64130800 | 1.93128000  | H | -6.58184600 | 1.44065600  | -1.69475100 |
| C | -2.73106900 | 1.64077000  | -1.93170600 | H | 2.63080200  | -3.31526300 | -0.64789400 |
| C | -3.50344600 | 2.38886400  | -2.81297700 | H | 4.71701900  | -4.57919800 | -0.66720800 |
| C | -4.89944000 | 2.32443600  | -2.73613500 | H | 6.89597200  | -3.40166000 | -0.31640600 |
| C | -5.50251900 | 1.51518400  | -1.78257800 | H | 6.91521000  | -0.99018700 | 0.10535200  |
| O | -5.40306900 | 0.00015500  | 0.00017800  | H | 6.91515400  | 0.99049600  | -0.10512700 |
| C | 3.54531300  | -1.37025200 | -0.39319300 | H | 6.89574400  | 3.40196700  | 0.31664300  |
| C | 4.78266000  | -0.71606600 | -0.13057100 | H | 4.71670000  | 4.57936700  | 0.66734200  |
| C | 4.78261000  | 0.71624100  | 0.13068500  | H | 2.63056100  | 3.31530100  | 0.64791200  |

### S-SFC

|   |             |             |             |   |             |             |             |
|---|-------------|-------------|-------------|---|-------------|-------------|-------------|
| C | 1.34386900  | 2.15535100  | 1.72514700  | C | -3.74742500 | 1.28390300  | 0.29002800  |
| C | 1.25059900  | 1.08539900  | 0.85311900  | C | -3.52800700 | -2.88534900 | -0.54056100 |
| C | -0.02764000 | 0.64948900  | 0.48298900  | C | -4.67037900 | -3.66583500 | -0.53957500 |
| C | -1.24634500 | 1.23140700  | 0.84738500  | C | -5.92822700 | -3.06489000 | -0.39230200 |
| C | -1.11958700 | 2.28975000  | 1.78660400  | C | -6.01096600 | -1.69592500 | -0.21345800 |
| C | 0.13907800  | 2.72195300  | 2.20181900  | C | -6.16592900 | 1.25923000  | -0.06616800 |
| C | 0.05870700  | -0.47966200 | -0.35977300 | C | -6.23438300 | 2.62876300  | 0.11440600  |
| C | -1.07052500 | -1.17214700 | -0.80590000 | C | -5.05604500 | 3.35323000  | 0.34146100  |
| C | -2.36659200 | -0.66922400 | -0.32756500 | C | -3.84296400 | 2.69228500  | 0.41821000  |
| C | -2.45191700 | 0.60520200  | 0.28666400  | H | 2.30145500  | 2.54527800  | 2.05886800  |
| C | 1.39768200  | -0.78754300 | -0.64082300 | H | -1.99396600 | 2.75033400  | 2.23002800  |
| C | 1.65062000  | -1.83688600 | -1.50554100 | H | 0.19445600  | 3.52916000  | 2.92750300  |
| C | 0.53817000  | -2.51141100 | -2.06174100 | H | 2.65841200  | -2.13364600 | -1.77678500 |
| C | -0.78108900 | -2.20779200 | -1.73418200 | H | 0.72124200  | -3.30363100 | -2.78305600 |
| C | 2.31381400  | 0.20475200  | 0.14937300  | H | -1.57524700 | -2.74668700 | -2.23639500 |
| C | 3.15939900  | -0.57656100 | 1.17759300  | H | 6.12562500  | 1.01554700  | -2.53591200 |
| C | 4.41913600  | -1.10995200 | 0.85876400  | H | 5.17748300  | 3.10262200  | -3.48428600 |
| C | 4.42187800  | 0.61495100  | -1.28212800 | H | 2.93123400  | 3.88736800  | -2.71681100 |
| C | 3.16160400  | 1.04197200  | -0.83158700 | H | 1.68578000  | 2.59210500  | -1.04397700 |
| C | 5.14309900  | 1.36035800  | -2.22537400 | H | 1.68091900  | -0.44954600 | 2.73422300  |
| C | 4.61248500  | 2.53303500  | -2.75164800 | H | 2.92074200  | -1.81030700 | 4.35931000  |
| C | 3.36134100  | 2.97248600  | -2.31923800 | H | 5.16641200  | -2.73172400 | 3.76046700  |
| C | 2.65699700  | 2.23695000  | -1.36887400 | H | 6.11985300  | -2.25209900 | 1.52100300  |
| C | 2.65171800  | -0.84539700 | 2.45860600  | H | -2.56563700 | -3.37719600 | -0.57593000 |
| C | 3.35286300  | -1.61813900 | 3.38135400  | H | -4.58475700 | -4.74575500 | -0.62395200 |
| C | 4.60377700  | -2.13660200 | 3.04653900  | H | -6.83032300 | -3.67037100 | -0.38233400 |
| C | 5.13738000  | -1.87359800 | 1.78964700  | H | -6.98421300 | -1.25180900 | -0.03659600 |
| S | 5.16906400  | -0.90501000 | -0.74033800 | H | -7.07552500 | 0.71947000  | -0.30488200 |
| C | -3.58446700 | -1.47485400 | -0.41233300 | H | -7.19062100 | 3.13980000  | 0.04443400  |
| C | -4.86098500 | -0.87674300 | -0.21030200 | H | -5.08587500 | 4.43594700  | 0.42852200  |
| C | -4.94115500 | 0.56065900  | 0.00741500  | H | -2.93998600 | 3.27960100  | 0.51367800  |



**N-SFC**

|   |             |             |             |   |             |             |             |
|---|-------------|-------------|-------------|---|-------------|-------------|-------------|
| C | -0.09320600 | -3.09893200 | 1.04935700  | C | 4.63048700  | -0.92476900 | -0.25213600 |
| C | -0.25299500 | -1.80153400 | 0.59591800  | C | 3.71131000  | 3.17716900  | 0.41740200  |
| C | 0.90001700  | -1.05088300 | 0.33490800  | C | 4.71965600  | 4.10035900  | 0.62998700  |
| C | 2.22298000  | -1.49800800 | 0.41461400  | C | 6.06077500  | 3.71469400  | 0.49748900  |
| C | 2.35510000  | -2.81268700 | 0.93662700  | C | 6.36300900  | 2.40081400  | 0.18873700  |
| C | 1.22599800  | -3.57147500 | 1.24025500  | C | 6.96643000  | -0.36026400 | -0.70123000 |
| C | 0.55772300  | 0.25974400  | -0.06195500 | C | 7.25489900  | -1.67785500 | -1.00736700 |
| C | 1.51911200  | 1.24647800  | -0.29891800 | C | 6.22754800  | -2.63116100 | -0.98359900 |
| C | 2.91866600  | 0.84875500  | -0.08872500 | C | 4.94572600  | -2.25629500 | -0.62192000 |
| C | 3.25626500  | -0.52113600 | 0.04410300  | H | -0.94150900 | -3.73880300 | 1.27576100  |
| C | -0.83498700 | 0.40405700  | -0.15260300 | H | 3.33036600  | -3.23326300 | 1.14958900  |
| C | -1.32839600 | 1.61891600  | -0.59112500 | H | 1.36819700  | -4.57006400 | 1.64513600  |
| C | -0.39237100 | 2.62242000  | -0.93648400 | H | -2.38923600 | 1.81740200  | -0.69770600 |
| C | 0.98404100  | 2.46354300  | -0.79921300 | H | -0.76714100 | 3.56292900  | -1.33188200 |
| C | -1.50029900 | -0.93860600 | 0.29401700  | H | 1.63247300  | 3.26791600  | -1.12463500 |
| C | -2.38633500 | -0.74580400 | 1.53723600  | H | -5.62224300 | -1.55937300 | -1.83584700 |
| C | -3.73943800 | -0.40651400 | 1.35870600  | H | -4.71245600 | -3.18961800 | -3.46915700 |
| C | -3.72287600 | -1.18179000 | -0.90155300 | H | -2.28478600 | -3.76926200 | -3.41198900 |
| C | -2.36881100 | -1.55321200 | -0.81725800 | H | -0.82728700 | -2.77078300 | -1.68802700 |
| C | -4.56439700 | -1.80056200 | -1.83584300 | H | -0.86115900 | -1.16775700 | 2.99061600  |
| C | -4.05111100 | -2.72228400 | -2.74472800 | H | -2.34451400 | -0.90417600 | 4.94644400  |
| C | -2.69665500 | -3.05420200 | -2.70550400 | H | -4.76999600 | -0.42075700 | 4.60529900  |
| C | -1.87231500 | -2.48459500 | -1.73632900 | H | -5.65207000 | -0.13890700 | 2.30405200  |
| C | -1.90535500 | -0.91564400 | 2.84042200  | H | -4.89531600 | 0.48818800  | -2.49867800 |
| C | -2.74422400 | -0.77427900 | 3.94473500  | H | -5.98415200 | 2.54438400  | -3.20138000 |
| C | -4.09758700 | -0.49343500 | 3.75490800  | H | -6.58971800 | 4.31018400  | -1.54046300 |
| C | -4.59543900 | -0.32533800 | 2.46535900  | H | -6.00546500 | 3.93924600  | 0.86053300  |
| N | -4.23725700 | -0.23336500 | 0.03259800  | H | -4.91597800 | 1.88888500  | 1.57933900  |
| C | -4.86747600 | 0.97186200  | -0.38496700 | H | 2.68873900  | 3.47640900  | 0.60217800  |
| C | -5.16161600 | 1.21438500  | -1.74299900 | H | 4.46720000  | 5.11445800  | 0.92764100  |
| C | -5.77427200 | 2.40007300  | -2.14445800 | H | 6.85962100  | 4.43058200  | 0.67035900  |
| C | -6.10651400 | 3.39122200  | -1.22233900 | H | 7.40434400  | 2.10069900  | 0.15264200  |
| C | -5.78621200 | 3.17668300  | 0.11730300  | H | 7.75550000  | 0.37867000  | -0.78565300 |
| C | -5.17351000 | 1.99666100  | 0.53463900  | H | 8.26279000  | -1.96095700 | -1.29806600 |
| C | 3.98837400  | 1.83700500  | 0.04815100  | H | 6.42569700  | -3.65867300 | -1.27643300 |
| C | 5.35334600  | 1.43911800  | -0.03311400 | H | 4.15470100  | -2.99069700 | -0.68835700 |
| C | 5.66730200  | 0.04842200  | -0.32875700 |   |             |             |             |

SBC

|   |             |             |             |   |             |             |             |
|---|-------------|-------------|-------------|---|-------------|-------------|-------------|
| C | 2.29019800  | 0.51659600  | 0.48096400  | C | -0.79770100 | 1.81053200  | -1.82138600 |
| C | 3.46384200  | 1.10734300  | 0.95619800  | C | -1.95650600 | 2.37382700  | -2.40554200 |
| C | 4.71705400  | 0.60034300  | 0.37711800  | C | -3.24964800 | 2.04889400  | -1.99903600 |
| C | 4.71705400  | -0.60034300 | -0.37711800 | C | -8.40341500 | -1.46178400 | 0.24049300  |
| C | 3.46384200  | -1.10734300 | -0.95619800 | C | -8.39630600 | -2.80401500 | 0.57397500  |
| C | 2.29019800  | -0.51659600 | -0.48096400 | C | -7.17594500 | -3.44250900 | 0.83490300  |
| C | 5.97640600  | 1.33323500  | 0.50469100  | C | -5.99610500 | -2.72120400 | 0.79177900  |
| C | 7.21381000  | 0.70288300  | 0.18944400  | C | -5.99610500 | 2.72120400  | -0.79177900 |
| C | 7.21381000  | -0.70288300 | -0.18944400 | C | -7.17594500 | 3.44250900  | -0.83490300 |
| C | 5.97640600  | -1.33323500 | -0.50469100 | C | -8.39630600 | 2.80401500  | -0.57397500 |
| C | 5.99610500  | 2.72120400  | 0.79177900  | C | -8.40341500 | 1.46178400  | -0.24049300 |
| C | 7.17594500  | 3.44250900  | 0.83490300  | C | 0.00000000  | 0.00000000  | 0.00000000  |
| C | 8.39630600  | 2.80401500  | 0.57397500  | H | 5.06182600  | 3.25080800  | 0.91802700  |
| C | 8.40341500  | 1.46178400  | 0.24049300  | H | 7.14802600  | 4.50873800  | 1.04251900  |
| C | 8.40341500  | -1.46178400 | -0.24049300 | H | 9.32717100  | 3.36385000  | 0.59755300  |
| C | 8.39630600  | -2.80401500 | -0.57397500 | H | 9.34663200  | 0.99549000  | -0.02143500 |
| C | 7.17594500  | -3.44250900 | -0.83490300 | H | 9.34663200  | -0.99549000 | 0.02143500  |
| C | 5.99610500  | -2.72120400 | -0.79177900 | H | 9.32717100  | -3.36385000 | -0.59755300 |
| C | 0.97773400  | 0.85119300  | 0.84333900  | H | 7.14802600  | -4.50873800 | -1.04251900 |
| C | 0.79770100  | 1.81053200  | 1.82138600  | H | 5.06182600  | -3.25080800 | -0.91802700 |
| C | 1.95650600  | 2.37382700  | 2.40554200  | H | -0.18893500 | 2.11737800  | 2.15698400  |
| C | 3.24964800  | 2.04889400  | 1.99903600  | H | 1.83508100  | 3.09178800  | 3.21244700  |
| C | 3.24964800  | -2.04889400 | -1.99903600 | H | 4.08253100  | 2.49708200  | 2.52702300  |
| C | 1.95650600  | -2.37382700 | -2.40554200 | H | 4.08253100  | -2.49708200 | -2.52702300 |
| C | 0.79770100  | -1.81053200 | -1.82138600 | H | 1.83508100  | -3.09178800 | -3.21244700 |
| C | 0.97773400  | -0.85119300 | -0.84333900 | H | -0.18893500 | -2.11737800 | -2.15698400 |
| C | -7.21381000 | -0.70288300 | 0.18944400  | H | -4.08253100 | -2.49708200 | 2.52702300  |
| C | -5.97640600 | -1.33323500 | 0.50469100  | H | -1.83508100 | -3.09178800 | 3.21244700  |
| C | -4.71705400 | -0.60034300 | 0.37711800  | H | 0.18893500  | -2.11737800 | 2.15698400  |
| C | -4.71705400 | 0.60034300  | -0.37711800 | H | 0.18893500  | 2.11737800  | -2.15698400 |
| C | -5.97640600 | 1.33323500  | -0.50469100 | H | -1.83508100 | 3.09178800  | -3.21244700 |
| C | -7.21381000 | 0.70288300  | -0.18944400 | H | -4.08253100 | 2.49708200  | -2.52702300 |
| C | -3.46384200 | -1.10734300 | 0.95619800  | H | -9.34663200 | -0.99549000 | -0.02143500 |
| C | -2.29019800 | -0.51659600 | 0.48096400  | H | -9.32717100 | -3.36385000 | 0.59755300  |
| C | -2.29019800 | 0.51659600  | -0.48096400 | H | -7.14802600 | -4.50873800 | 1.04251900  |
| C | -3.46384200 | 1.10734300  | -0.95619800 | H | -5.06182600 | -3.25080800 | 0.91802700  |
| C | -3.24964800 | -2.04889400 | 1.99903600  | H | -5.06182600 | 3.25080800  | -0.91802700 |
| C | -1.95650600 | -2.37382700 | 2.40554200  | H | -7.14802600 | 4.50873800  | -1.04251900 |
| C | -0.79770100 | -1.81053200 | 1.82138600  | H | -9.32717100 | 3.36385000  | -0.59755300 |
| C | -0.97773400 | -0.85119300 | 0.84333900  | H | -9.34663200 | 0.99549000  | 0.02143500  |
| C | -0.97773400 | 0.85119300  | -0.84333900 |   |             |             |             |

### SBP

|   |             |             |             |   |             |             |             |
|---|-------------|-------------|-------------|---|-------------|-------------|-------------|
| C | -3.38624200 | 0.00000000  | 1.98784800  | C | 0.00000000  | 0.68873300  | -4.69103600 |
| C | -2.86303600 | 0.00000000  | 3.27873400  | C | 0.00000000  | -1.20302800 | -0.97940200 |
| C | -1.45921200 | 0.00000000  | 3.46722800  | C | 0.00000000  | -2.57628800 | -0.82063400 |
| C | -0.70422500 | 0.00000000  | 2.28906800  | C | 0.00000000  | -3.38624200 | -1.98784800 |
| C | -1.20302800 | 0.00000000  | 0.97940200  | C | 0.00000000  | -2.86303600 | -3.27873400 |
| C | -2.57628800 | 0.00000000  | 0.82063400  | C | 0.00000000  | 0.00000000  | 0.00000000  |
| C | -0.68873300 | 0.00000000  | 4.69103600  | H | -4.46607100 | 0.00000000  | 1.86317600  |
| C | 0.68873300  | 0.00000000  | 4.69103600  | H | -3.53509400 | 0.00000000  | 4.13363100  |
| C | 1.45921200  | 0.00000000  | 3.46722800  | H | -3.04428900 | 0.00000000  | -0.15999400 |
| C | 0.70422500  | 0.00000000  | 2.28906800  | H | -1.21681000 | 0.00000000  | 5.64194000  |
| C | 2.86303600  | 0.00000000  | 3.27873400  | H | 1.21681000  | 0.00000000  | 5.64194000  |
| C | 3.38624200  | 0.00000000  | 1.98784800  | H | 3.53509400  | 0.00000000  | 4.13363100  |
| C | 2.57628800  | 0.00000000  | 0.82063400  | H | 4.46607100  | 0.00000000  | 1.86317600  |
| C | 1.20302800  | 0.00000000  | 0.97940200  | H | 3.04428900  | 0.00000000  | -0.15999400 |
| C | 0.00000000  | 2.57628800  | -0.82063400 | H | 0.00000000  | 3.04428900  | 0.15999400  |
| C | 0.00000000  | 1.20302800  | -0.97940200 | H | 0.00000000  | 3.53509400  | -4.13363100 |
| C | 0.00000000  | 0.70422500  | -2.28906800 | H | 0.00000000  | 4.46607100  | -1.86317600 |
| C | 0.00000000  | 1.45921200  | -3.46722800 | H | 0.00000000  | -1.21681000 | -5.64194000 |
| C | 0.00000000  | 2.86303600  | -3.27873400 | H | 0.00000000  | 1.21681000  | -5.64194000 |
| C | 0.00000000  | 3.38624200  | -1.98784800 | H | 0.00000000  | -3.04428900 | 0.15999400  |
| C | 0.00000000  | -0.70422500 | -2.28906800 | H | 0.00000000  | -4.46607100 | -1.86317600 |
| C | 0.00000000  | -1.45921200 | -3.46722800 | H | 0.00000000  | -3.53509400 | -4.13363100 |
| C | 0.00000000  | -0.68873300 | -4.69103600 |   |             |             |             |

## 6. X-ray data

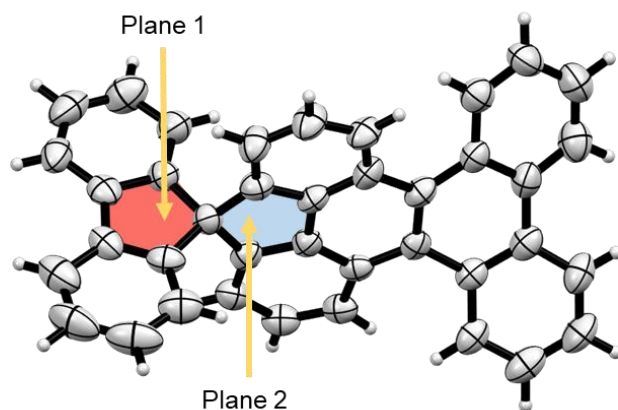

**Figure S18** Plane selection for dihedral angles of the spiral part: represented by **SFC**

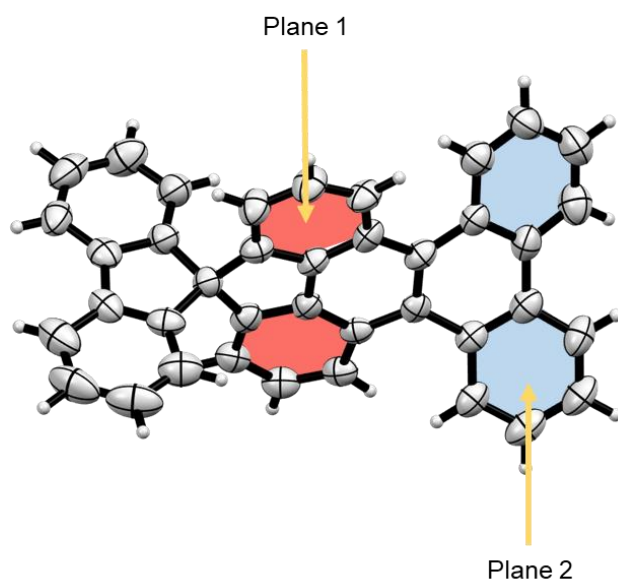

**Figure S19** Plane selection for DBC partial dihedral angles: represented by **SFC**

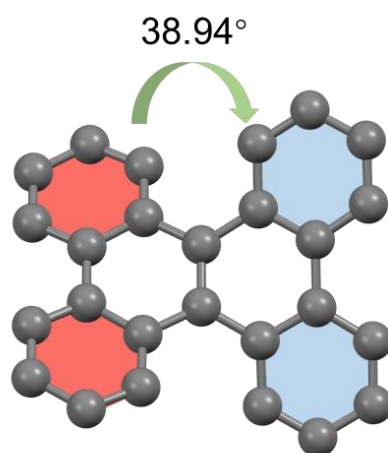

**Figure S20** Dihedral angle of the **DBC** (See CCDC: 860843)

**Table S11** Crystallographic data and structure refinement details for **SFC**.

| 2376775<br>(CCDC)                           | SFC                                                           |
|---------------------------------------------|---------------------------------------------------------------|
| Empirical formula                           | C <sub>39</sub> H <sub>22</sub>                               |
| Formula weight                              | 490.56                                                        |
| Temperature/K                               | 293(2)                                                        |
| Crystal system                              | monoclinic                                                    |
| Space group                                 | P2 <sub>1</sub>                                               |
| a/Å                                         | 9.705(2)                                                      |
| b/Å                                         | 12.2325(19)                                                   |
| c/Å                                         | 10.991(2)                                                     |
| α/°                                         | 90                                                            |
| β/°                                         | 107.73(2)                                                     |
| γ/°                                         | 90                                                            |
| Volume/Å <sup>3</sup>                       | 1242.8(5)                                                     |
| Z                                           | 2                                                             |
| ρ <sub>calc</sub> /cm <sup>3</sup>          | 1.311                                                         |
| μ/mm <sup>-1</sup>                          | 0.074                                                         |
| F(000)                                      | 512                                                           |
| Crystal size/mm <sup>3</sup>                | 0.02 × 0.01 × 0.01                                            |
| Radiation                                   | Mo Kα (λ = 0.71073)                                           |
| 2θ range for data collection/°              | 4.406 to 50.052                                               |
| Index ranges                                | -11 ≤ h ≤ 10, -14 ≤ k ≤ 11, -11 ≤ l ≤ 13                      |
| Reflections collected                       | 7932                                                          |
| Independent reflections                     | 3628 [R <sub>int</sub> = 0.0821, R <sub>sigma</sub> = 0.1237] |
| Data/restraints/parameters                  | 3628/1/353                                                    |
| Goodness-of-fit on F <sup>2</sup>           | 0.982                                                         |
| Final R indexes [I ≥ 2σ (I)]                | R <sub>1</sub> = 0.0666, wR <sub>2</sub> = 0.1636             |
| Final R indexes [all data]                  | R <sub>1</sub> = 0.1110, wR <sub>2</sub> = 0.1934             |
| Largest diff. peak/hole / e Å <sup>-3</sup> | 0.27/-0.23                                                    |
| Flack parameter                             | 10.0(10)                                                      |

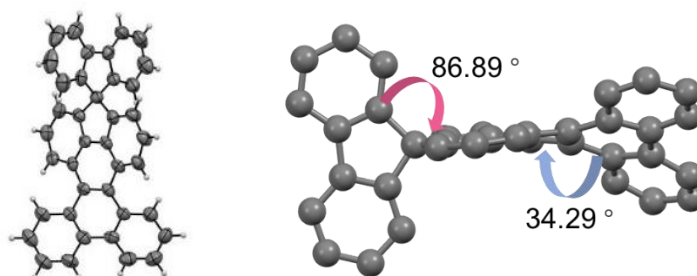**Figure S21** The thermal ellipsoid plot (left, at 50% probability) and dihedral angle (right) for **SFC**. Solvent: CH<sub>3</sub>OH/CHCl<sub>3</sub>.

**Table S12** Crystallographic data and structure refinement details for **C-SFC**.

| 2376798<br>(CCDC)                           | <b>C-SFC</b>                                                   |
|---------------------------------------------|----------------------------------------------------------------|
| Empirical formula                           | C <sub>40</sub> H <sub>24</sub>                                |
| Formula weight                              | 504.59                                                         |
| Temperature/K                               | 100.00(12)                                                     |
| Crystal system                              | triclinic                                                      |
| Space group                                 | P-1                                                            |
| a/Å                                         | 12.1966(2)                                                     |
| b/Å                                         | 15.0518(2)                                                     |
| c/Å                                         | 15.8144(2)                                                     |
| α/°                                         | 74.5940(10)                                                    |
| β/°                                         | 67.6580(10)                                                    |
| γ/°                                         | 88.5750(10)                                                    |
| Volume/Å <sup>3</sup>                       | 2579.34(7)                                                     |
| Z                                           | 4                                                              |
| ρ <sub>calc</sub> /cm <sup>3</sup>          | 1.299                                                          |
| μ/mm <sup>-1</sup>                          | 0.356                                                          |
| F(000)                                      | 1056                                                           |
| Crystal size/mm <sup>3</sup>                | 0.05 × 0.05 × 0.03                                             |
| Radiation                                   | Ga Kα (λ = 1.3405)                                             |
| 2θ range for data collection/°              | 5.314 to 120.482                                               |
| Index ranges                                | -15 ≤ h ≤ 15, -15 ≤ k ≤ 19, -20 ≤ l ≤ 20                       |
| Reflections collected                       | 32363                                                          |
| Independent reflections                     | 11475 [R <sub>int</sub> = 0.0314, R <sub>sigma</sub> = 0.0361] |
| Data/restraints/parameters                  | 11475/0/729                                                    |
| Goodness-of-fit on F <sup>2</sup>           | 1.071                                                          |
| Final R indexes [I >= 2σ (I)]               | R <sub>1</sub> = 0.0407, wR <sub>2</sub> = 0.1025              |
| Final R indexes [all data]                  | R <sub>1</sub> = 0.0473, wR <sub>2</sub> = 0.1063              |
| Largest diff. peak/hole / e Å <sup>-3</sup> | 0.32/-0.22                                                     |

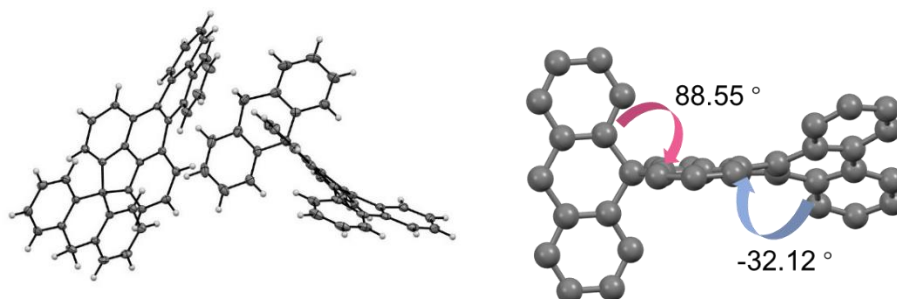**Figure S22** The thermal ellipsoid plot (left, at 50% probability) and dihedral angle (right) for **C-SFC**. Solvent: EtOAc/CH<sub>2</sub>Cl<sub>2</sub>.

Table S13 Crystallographic data and structure refinement details for **O-SFC**.

| 2376799<br>(CCDC)                           | <b>O-SFC</b>                                                  |
|---------------------------------------------|---------------------------------------------------------------|
| Empirical formula                           | C <sub>39</sub> H <sub>22</sub> O                             |
| Formula weight                              | 506.56                                                        |
| Temperature/K                               | 293(2)                                                        |
| Crystal system                              | monoclinic                                                    |
| Space group                                 | P2 <sub>1</sub>                                               |
| a/Å                                         | 9.6353(8)                                                     |
| b/Å                                         | 12.3817(8)                                                    |
| c/Å                                         | 10.9952(9)                                                    |
| α/°                                         | 90                                                            |
| β/°                                         | 105.922(8)                                                    |
| γ/°                                         | 90                                                            |
| Volume/Å <sup>3</sup>                       | 1261.42(17)                                                   |
| Z                                           | 2                                                             |
| ρ <sub>calc</sub> /cm <sup>3</sup>          | 1.334                                                         |
| μ/mm <sup>-1</sup>                          | 0.078                                                         |
| F(000)                                      | 528                                                           |
| Crystal size/mm <sup>3</sup>                | 0.05 × 0.04 × 0.02                                            |
| Radiation                                   | Mo Kα (λ = 0.71073)                                           |
| 2θ range for data collection/°              | 5.976 to 58.766                                               |
| Index ranges                                | -12 ≤ h ≤ 12, -14 ≤ k ≤ 15, -12 ≤ l ≤ 15                      |
| Reflections collected                       | 9958                                                          |
| Independent reflections                     | 4976 [R <sub>int</sub> = 0.0469, R <sub>sigma</sub> = 0.0665] |
| Data/restraints/parameters                  | 4976/1/362                                                    |
| Goodness-of-fit on F <sup>2</sup>           | 1                                                             |
| Final R indexes [I ≥ 2σ (I)]                | R <sub>1</sub> = 0.0469, wR <sub>2</sub> = 0.1044             |
| Final R indexes [all data]                  | R <sub>1</sub> = 0.0712, wR <sub>2</sub> = 0.1143             |
| Largest diff. peak/hole / e Å <sup>-3</sup> | 0.13/-0.15                                                    |
| Flack parameter                             | -2.4(10)                                                      |

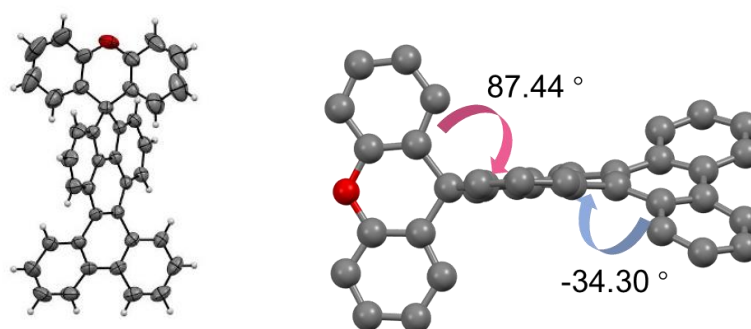

**Figure S23** The thermal ellipsoid plot (left, at 50% probability) and dihedral angle (right) for **O-SFC**. Solvent: CH<sub>3</sub>OH/CH<sub>2</sub>Cl<sub>2</sub>.

Table S14 Crystallographic data and structure refinement details for **SBC**.

| 2376797<br>(CCDC)                           | <b>SBC</b>                                                    |
|---------------------------------------------|---------------------------------------------------------------|
| Empirical formula                           | C <sub>53</sub> H <sub>28</sub>                               |
| Formula weight                              | 664.75                                                        |
| Temperature/K                               | 296.15                                                        |
| Crystal system                              | monoclinic                                                    |
| Space group                                 | P2 <sub>1</sub> /c                                            |
| a/Å                                         | 15.63(2)                                                      |
| b/Å                                         | 13.920(17)                                                    |
| c/Å                                         | 17.22(2)                                                      |
| α/°                                         | 90                                                            |
| β/°                                         | 114.31(3)                                                     |
| γ/°                                         | 90                                                            |
| Volume/Å <sup>3</sup>                       | 3415(7)                                                       |
| Z                                           | 4                                                             |
| ρ <sub>calc</sub> /cm <sup>3</sup>          | 1.293                                                         |
| μ/mm <sup>-1</sup>                          | 0.073                                                         |
| F(000)                                      | 1384                                                          |
| Crystal size/mm <sup>3</sup>                | 0.05 × 0.04 × 0.02                                            |
| Radiation                                   | MoKα (λ = 0.71073)                                            |
| 2θ range for data collection/°              | 4.09 to 49.872                                                |
| Index ranges                                | -18 ≤ h ≤ 18, -16 ≤ k ≤ 16, -20 ≤ l ≤ 20                      |
| Reflections collected                       | 22223                                                         |
| Independent reflections                     | 5747 [R <sub>int</sub> = 0.1266, R <sub>sigma</sub> = 0.2411] |
| Data/restraints/parameters                  | 5747/0/478                                                    |
| Goodness-of-fit on F <sup>2</sup>           | 0.957                                                         |
| Final R indexes [I ≥ 2σ (I)]                | R <sub>1</sub> = 0.0650, wR <sub>2</sub> = 0.1091             |
| Final R indexes [all data]                  | R <sub>1</sub> = 0.2694, wR <sub>2</sub> = 0.1728             |
| Largest diff. peak/hole / e Å <sup>-3</sup> | 0.19/-0.21                                                    |

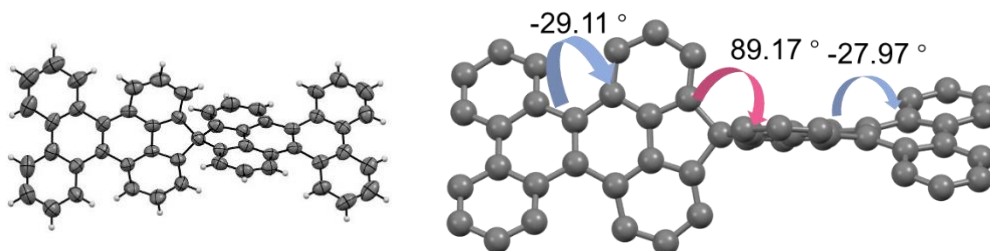

**Figure S24** The thermal ellipsoid plot (left, at 50% probability) and dihedral angle (right) for **SBC**. Solvent: CH<sub>3</sub>OH/CH<sub>2</sub>Cl<sub>2</sub>.



## References

1. Gaussian 16, Revision C.01,  
M. J. Frisch, G. W. Trucks, H. B. Schlegel, G. E. Scuseria,  
M. A. Robb, J. R. Cheeseman, G. Scalmani, V. Barone,  
G. A. Petersson, H. Nakatsuji, X. Li, M. Caricato, A. V. Marenich,  
J. Bloino, B. G. Janesko, R. Gomperts, B. Mennucci, H. P. Hratchian,  
J. V. Ortiz, A. F. Izmaylov, J. L. Sonnenberg, D. Williams-Young,  
F. Ding, F. Lipparini, F. Egidi, J. Goings, B. Peng, A. Petrone,  
T. Henderson, D. Ranasinghe, V. G. Zakrzewski, J. Gao, N. Rega,  
G. Zheng, W. Liang, M. Hada, M. Ehara, K. Toyota, R. Fukuda,  
J. Hasegawa, M. Ishida, T. Nakajima, Y. Honda, O. Kitao, H. Nakai,  
T. Vreven, K. Throssell, J. A. Montgomery, Jr., J. E. Peralta,  
F. Ogliaro, M. J. Bearpark, J. J. Heyd, E. N. Brothers, K. N. Kudin,  
V. N. Staroverov, T. A. Keith, R. Kobayashi, J. Normand,  
K. Raghavachari, A. P. Rendell, J. C. Burant, S. S. Iyengar,  
J. Tomasi, M. Cossi, J. M. Millam, M. Klene, C. Adamo, R. Cammi,  
J. W. Ochterski, R. L. Martin, K. Morokuma, O. Farkas,  
J. B. Foresman, and D. J. Fox, Gaussian, Inc., Wallingford CT, 2019.
2. Lu, T.; Chen, F., Multiwfn: A multifunctional wavefunction analyzer. *J. Comput. Chem.* *2012*, *33* (5), **580-592**.
3. Zhang, Y.; Song, K.; Wang, T.; Wu, S.; Xu, G.; Liao, S.; Ma, J.-A.; Li, Y., The Synthesis and Properties of Spirophenanthrene. *J. Org. Chem.* *2024*.
4. Akhmetov, V.; Feofanov, M.; Sharapa, D. I.; Amsharov, K., Alumina-Mediated  $\pi$ -Activation of Alkynes. *J. Am. Chem. Soc.* *2021*, *143* (37), **15420-15426**.
5. van der Ham, A.; Overkleeft, H. S.; Filippov, D. V.; Schneider, G. F., A Three-Step Synthesis of 4H-Cyclopenta[def]phenanthrene from Pyrene. *Eur. J. Org. Chem.* *2021*, *2021* (13), **2013-2017**.
6. Chaudhuri, R.; Hsu, M.-Y.; Li, C.-W.; Wang, C.-I.; Chen, C.-J.; Lai, C. K.; Chen, L.-Y.; Liu, S.-H.; Wu, C.-C.; Liu, R.-S., Functionalized Dibenzo[g,p]chrysenes: Variable Photophysical and Electronic Properties and Liquid-Crystal Chemistry. *Org. Lett.* *2008*, *10* (14), **3053-3056**.
7. Thiery, S.; Tondelier, D.; Declairieux, C.; Seo, G.; Geffroy, B.; Jeannin, O.; Rault-Berthelot, J.; Mé tivier, R.; Poriel, C., 9,9'-Spirobifluorene and 4-phenyl-9,9'-spirobifluorene: pure hydrocarbon small molecules as hosts for efficient green and blue PhOLEDs. *J. Mater. Chem. C* *2014*, *2* (21), **4156-4166**.
8. Lucas, F.; Ibraikulov, O. A.; Quinton, C.; Sicard, L.; Heiser, T.; Tondelier, D.; Geffroy, B.; Leclerc, N.; Rault-Berthelot, J.; Poriel, C., Spirophenylacridine-2,7-(diphenylphosphineoxide)-fluorene: A Bipolar Host for High-Efficiency Single-Layer Blue Phosphorescent Organic Light-Emitting Diodes. *Adv. Opt. Mater* *2020*, *8* (2), **1901225**.

## NMR Spectrogram

### spiro[benzo[*p*]indeno[7,1,2-*ghi*] chrysene-4,9'-fluorene] (SFC)

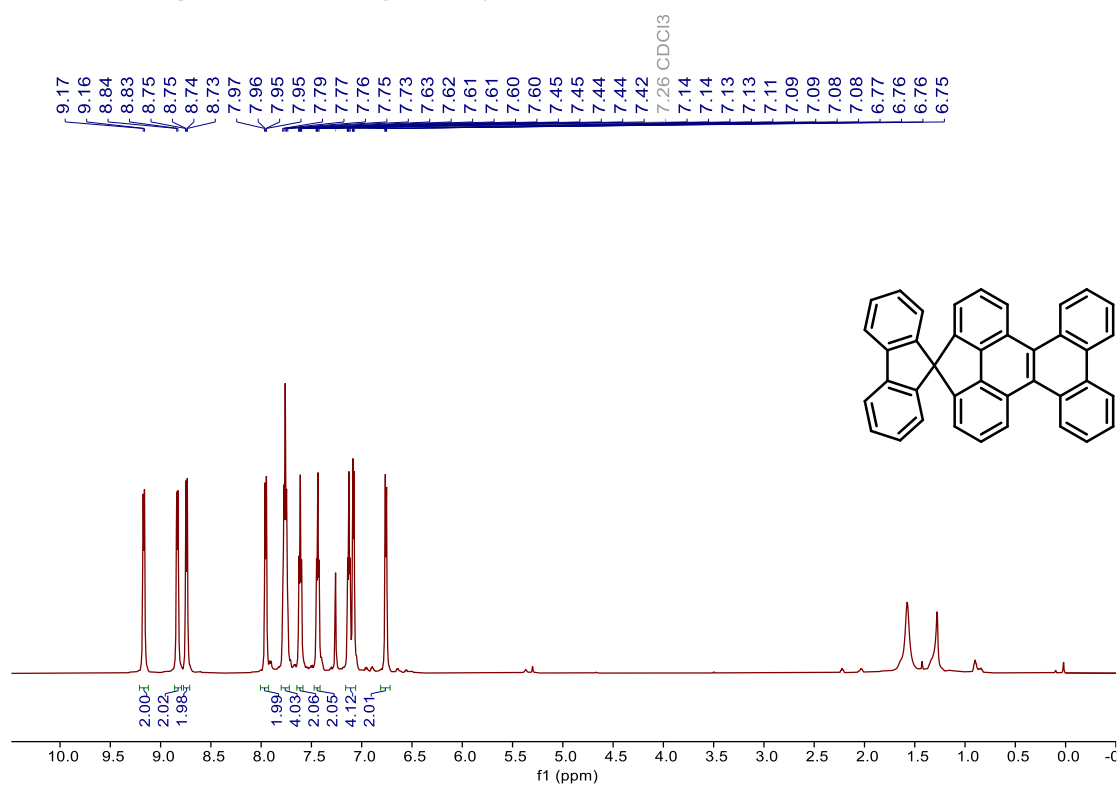

Figure S25 <sup>1</sup>H NMR spectrum (600 MHz, Chloroform-*d*) of SFC

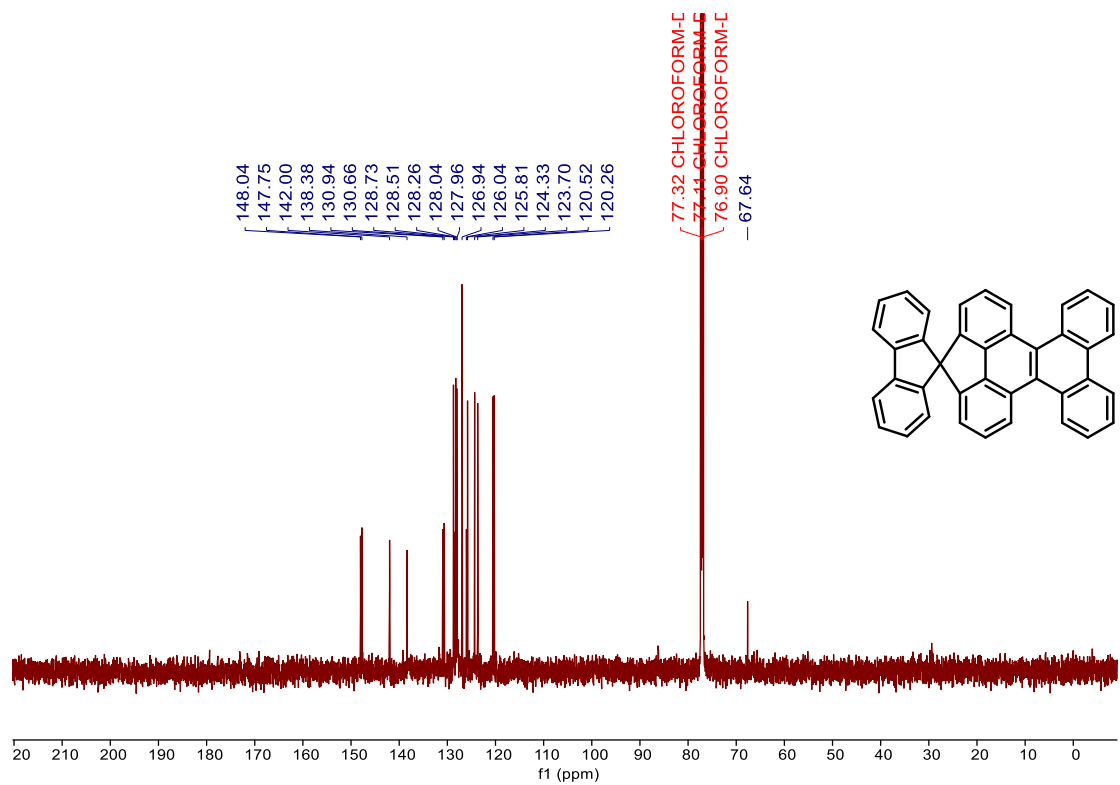

Figure S26 <sup>13</sup>C NMR spectrum (151 MHz, Chloroform-*d*) of SFC

**10H-spiro[anthracene-9, 4'-benzo[*p*]indeno[7,1,2-*gh*] chrysene] (C-SFC)**

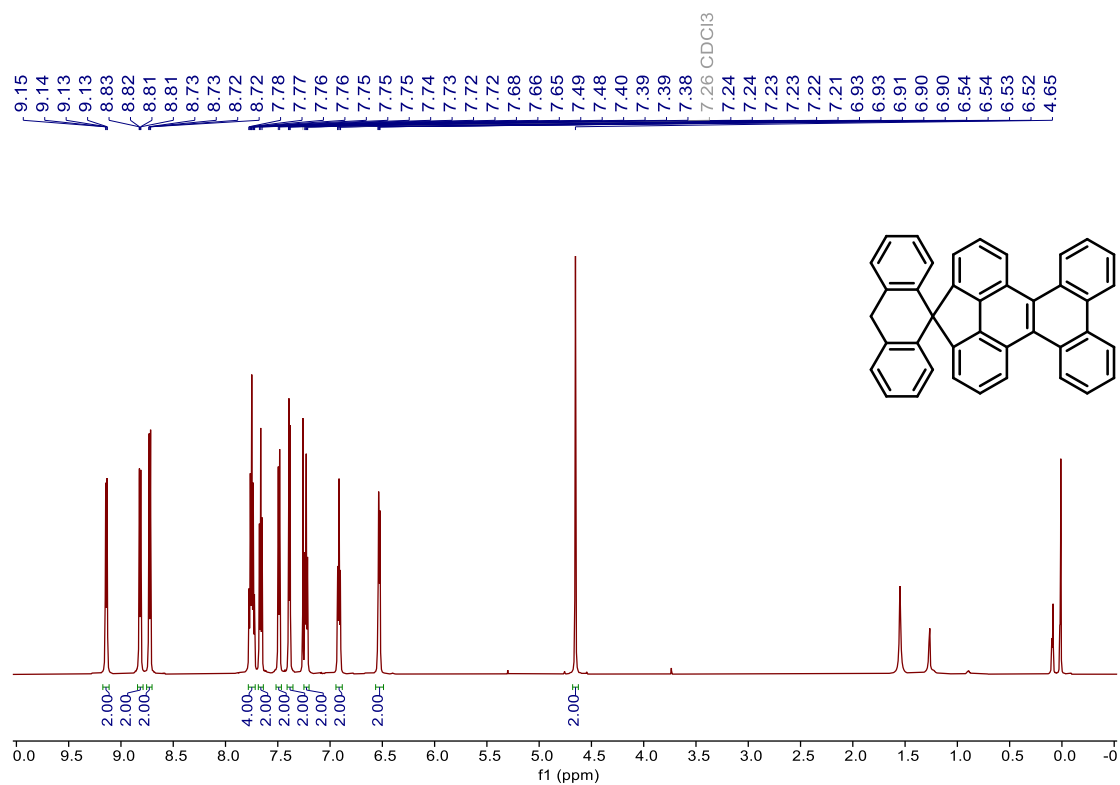

**Figure S27**  $^1\text{H}$  NMR spectrum (600 MHz, Chloroform-*d*) of C-SFC

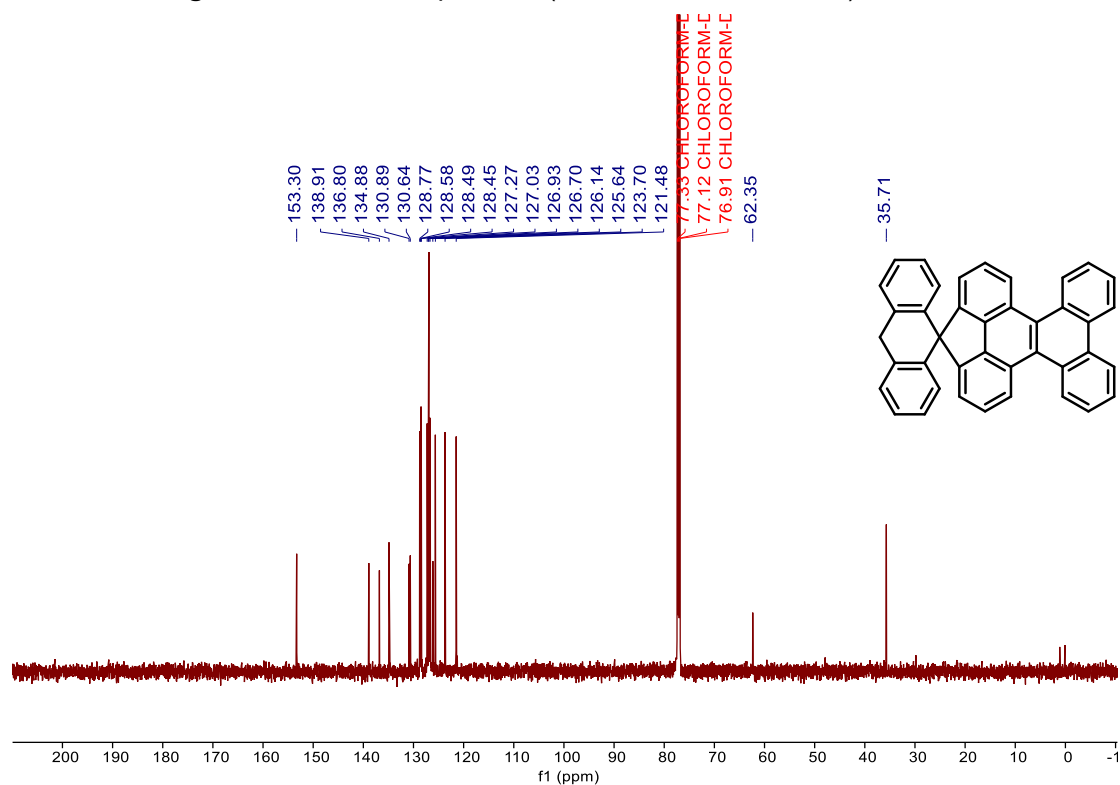

**Figure S28**  $^{13}\text{C}$  NMR spectrum (151 MHz, Chloroform-*d*) of C-SFC

spiro[benzo[*p*]indeno[7,1,2-*ghi*] chrysene-4,9'-xanthene] (O-SFC)

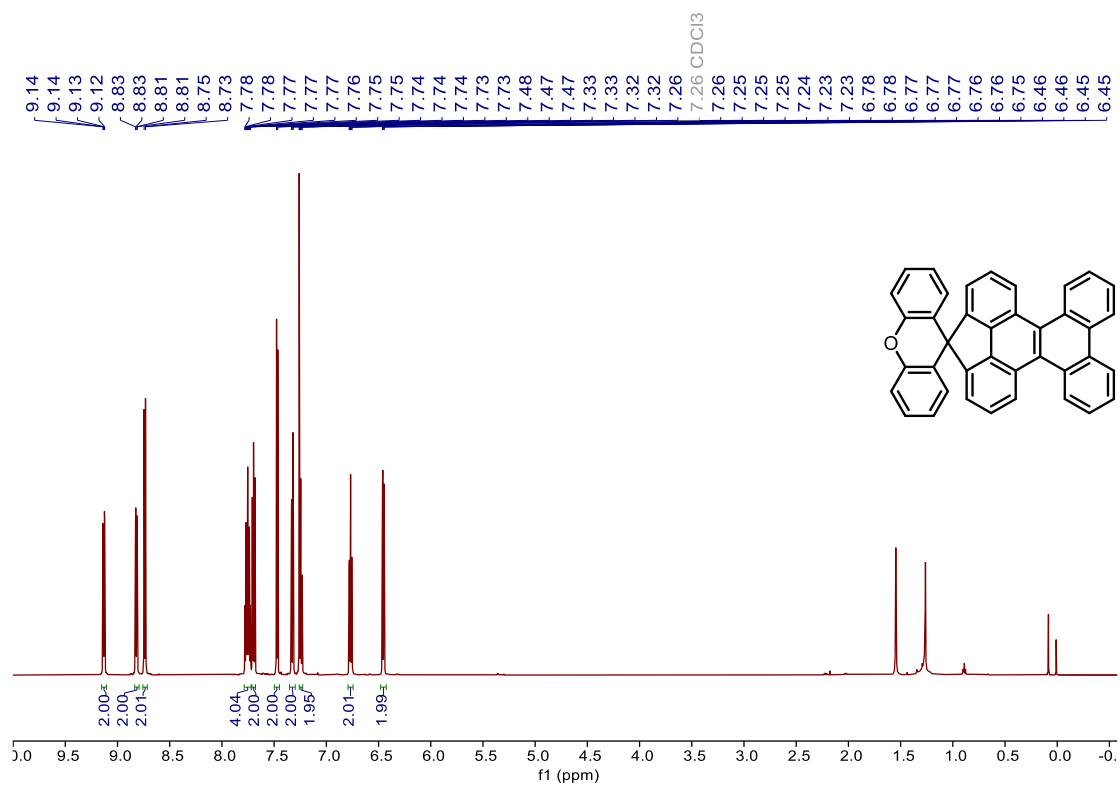

Figure S29  $^1\text{H}$  NMR spectrum (600 MHz, Chloroform-*d*) of O-SFC

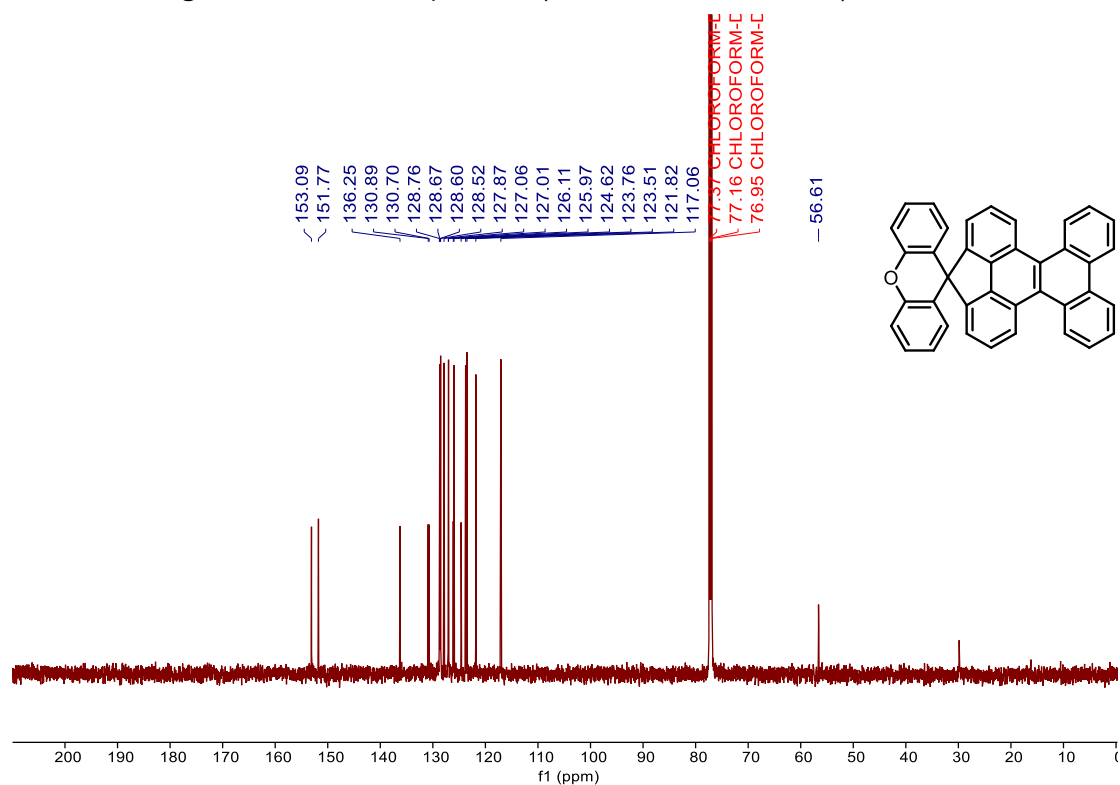

Figure S30  $^{13}\text{C}$  NMR spectrum (151 MHz, Chloroform-*d*) of O-SFC

spiro[benzo[*p*]indeno[7,1,2-*ghi*] chrysene-4,9'-thioxanthene] (**S-SFC**)

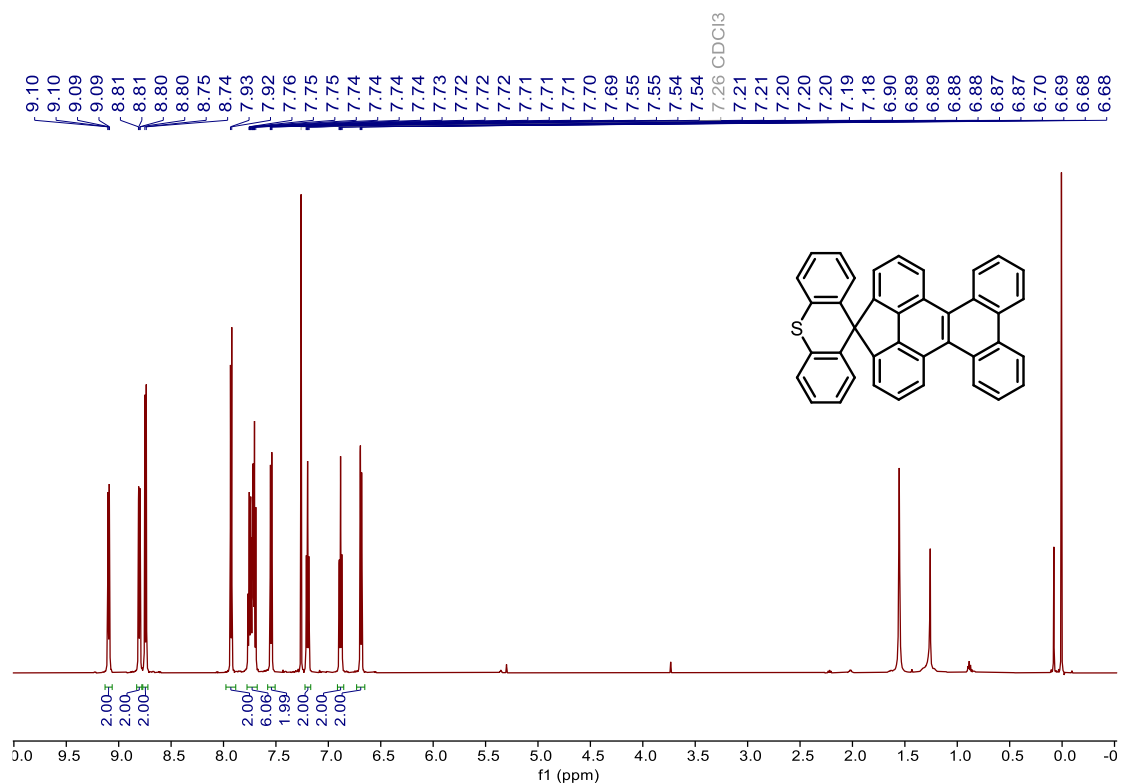

Figure S31  $^1\text{H}$  NMR spectrum (600 MHz, Chloroform-*d*) of **S-SFC**

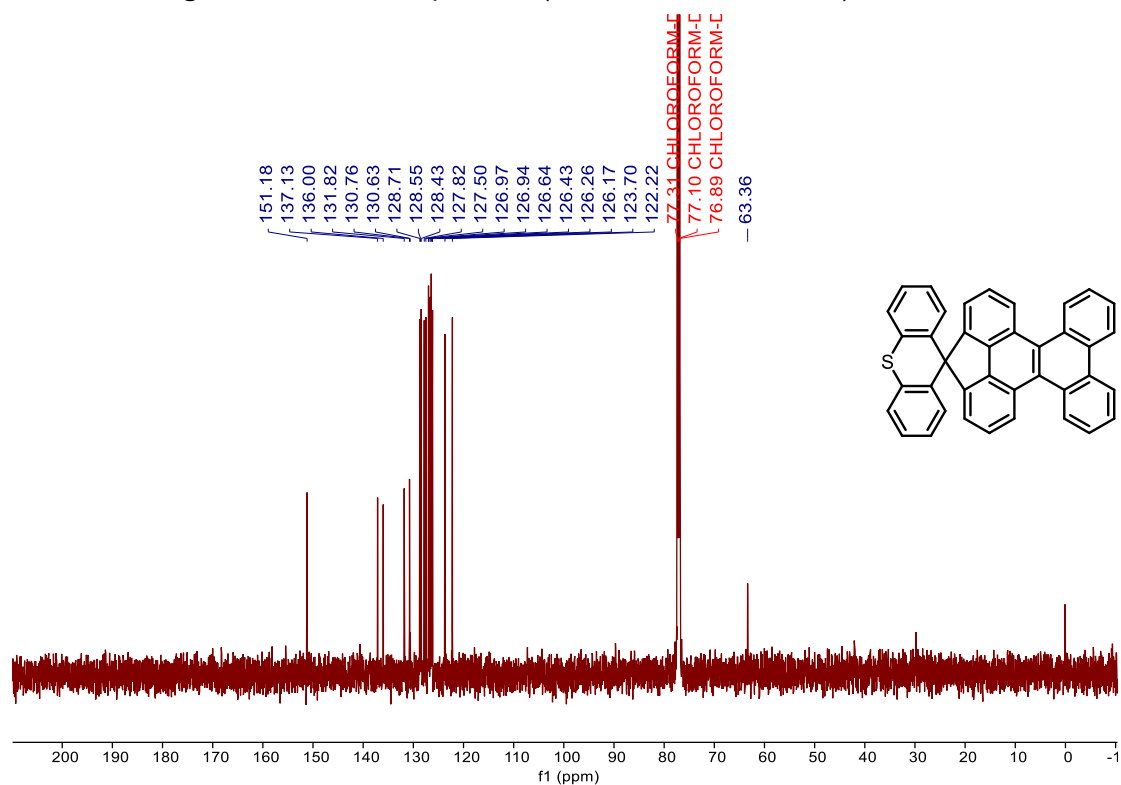

Figure S32  $^{13}\text{C}$  NMR spectrum (151 MHz, Chloroform-*d*) of **S-SFC**

**10-phenyl-10H-spiro[acridine-9,4'-benzo[*p*]indeno[7,1,2-*gh*]chrysene] (*N*-SFC)**

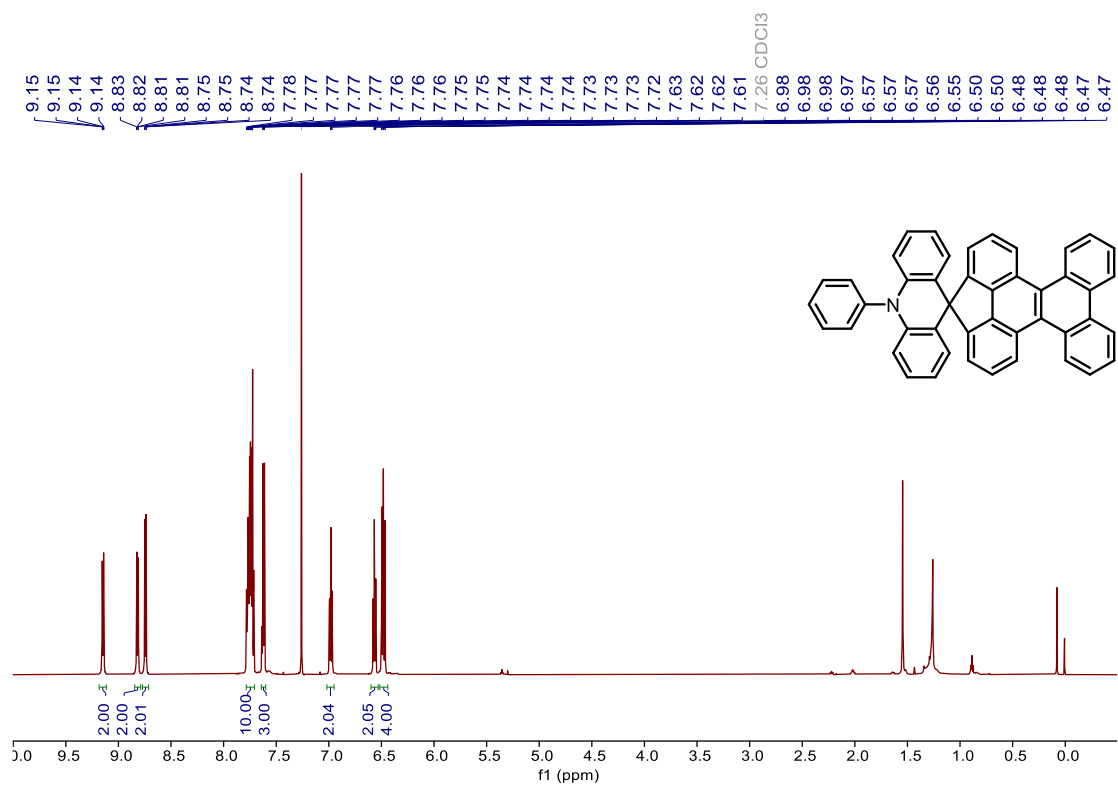

**Figure S33**  $^1\text{H}$  NMR spectrum (600 MHz, Chloroform-*d*) of *N*-SFC

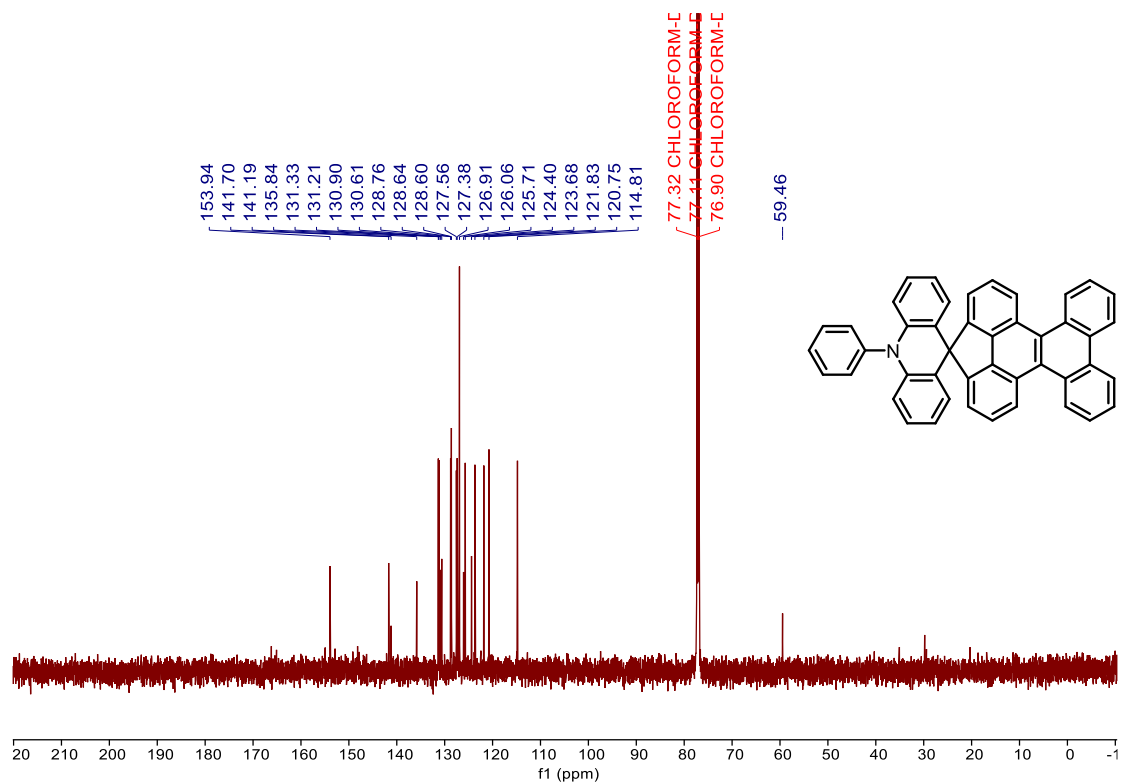

**Figure S34**  $^{13}\text{C}$  NMR spectrum (151 MHz, Chloroform-*d*) of *N*-SFC

### 4, 4'-spiro[benzo[*p*]indeno[7,1,2-*gh*]chrysene] (SBC)

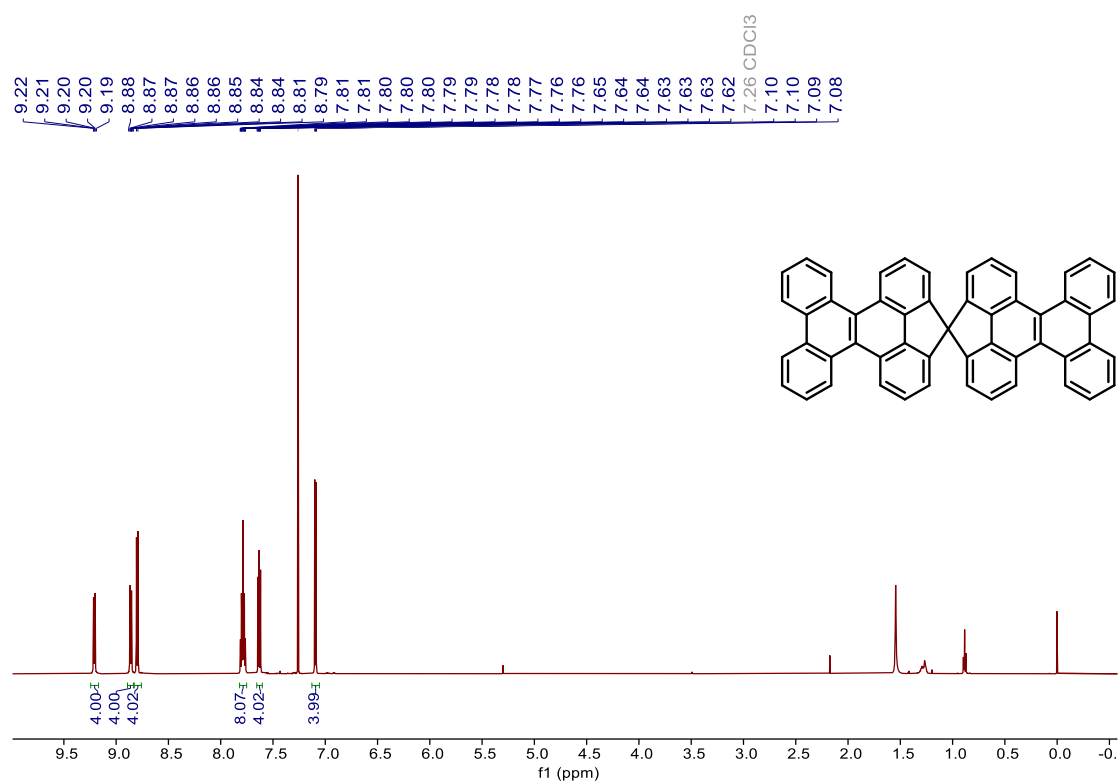

Figure S35 <sup>1</sup>H NMR spectrum (600 MHz, Chloroform-*d*) of SBC

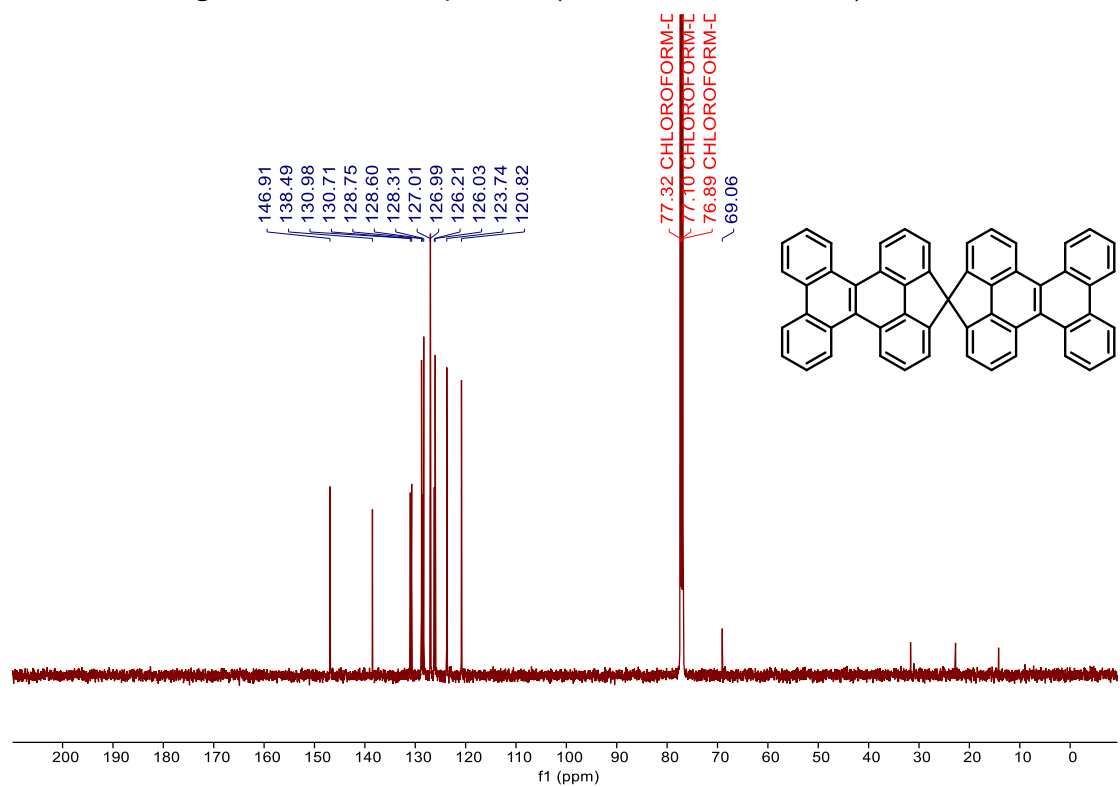

Figure S36 <sup>13</sup>C NMR spectrum (151 MHz, Chloroform-*d*) of SBC

### 4,4'-spirobi[cyclopenta[def]phenanthrene] (SBP)

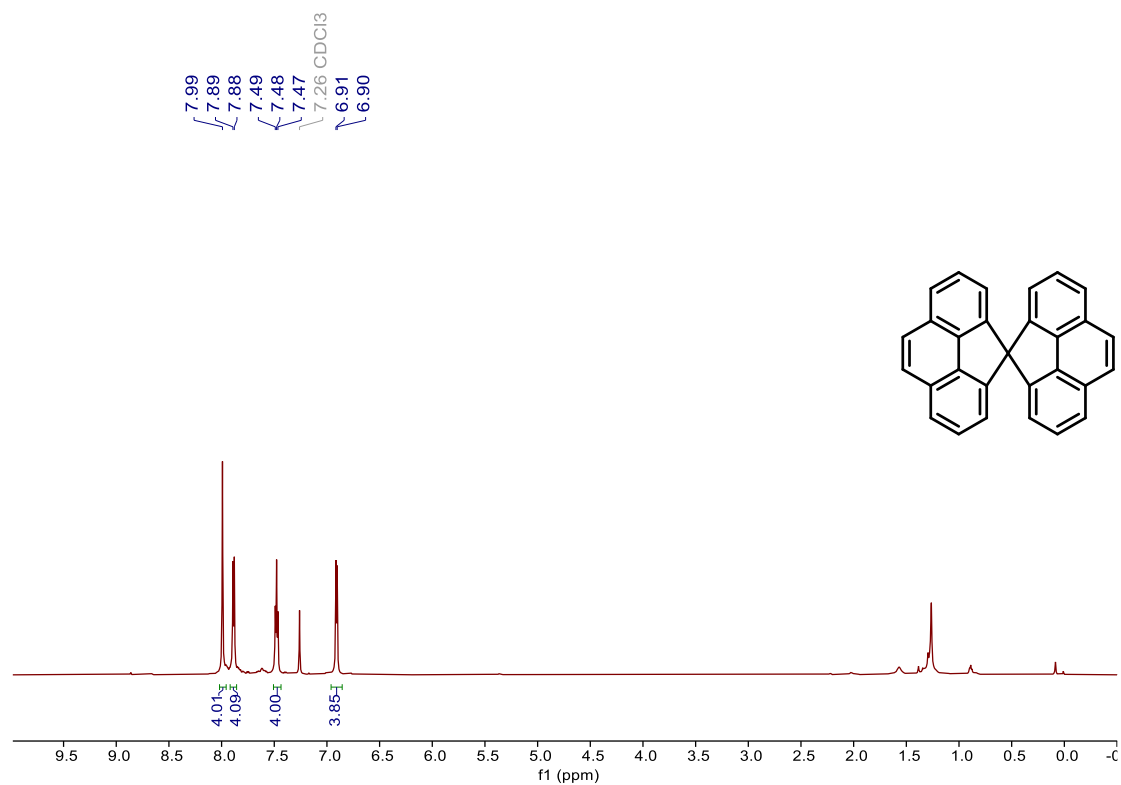

Figure S37 <sup>1</sup>H NMR spectrum (600 MHz, Chloroform-*d*) of SBP

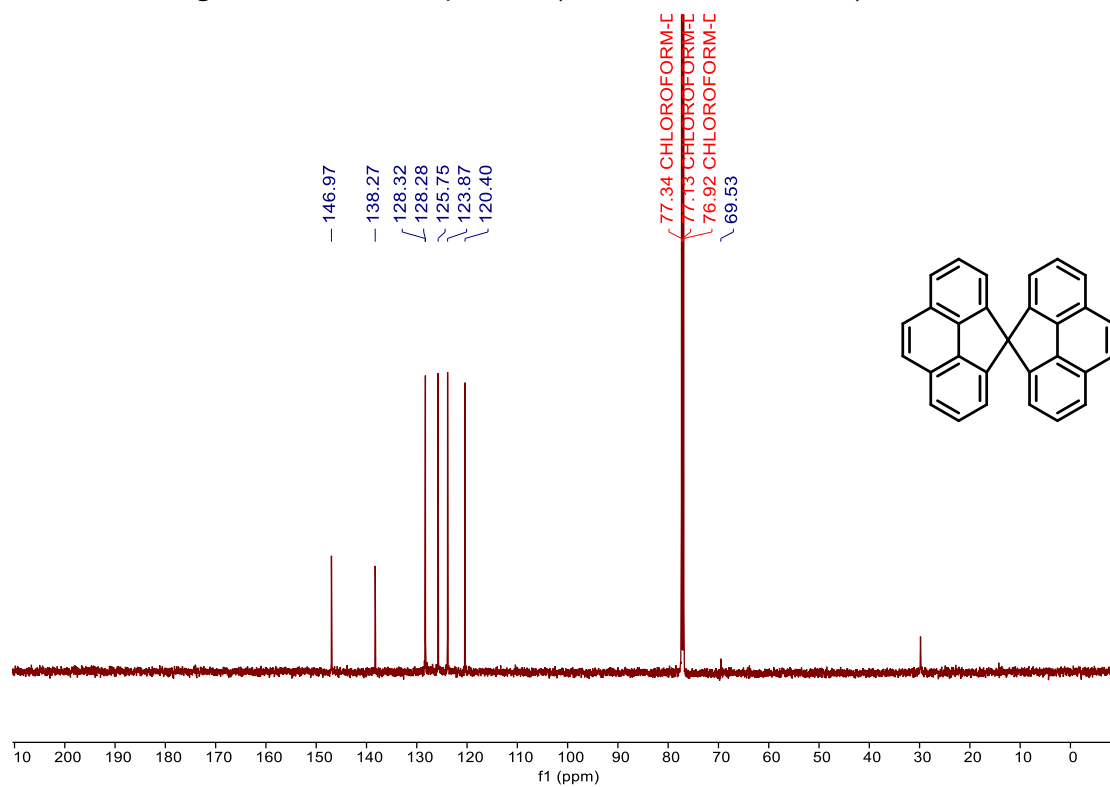

Figure S38 <sup>13</sup>C NMR spectrum (151 MHz, Chloroform-*d*) of SBP



**4H-benzo[*p*]indeno[7,1,2-*ghi*] chrysen-4-one (1f)**

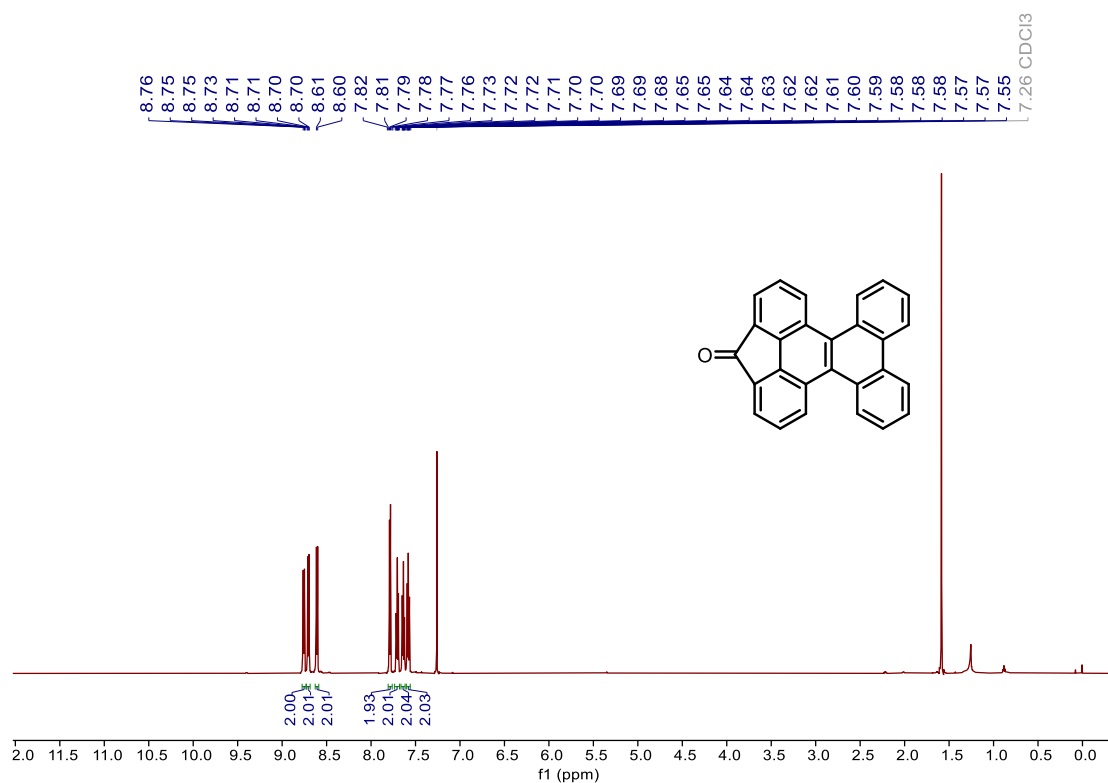

**Figure S39** <sup>1</sup>H NMR spectrum (600 MHz, Chloroform-*d*) of **4H-benzo[*p*]indeno[7,1,2-*ghi*] chrysen-4-one**

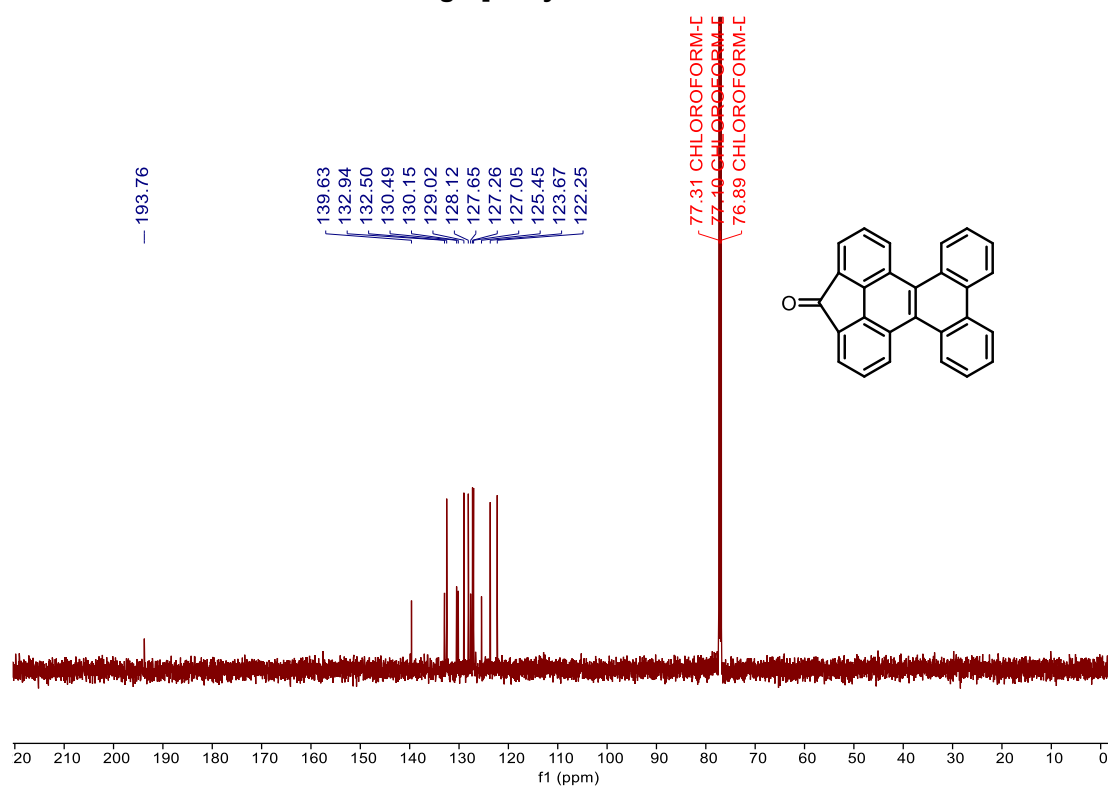

**Figure S40** <sup>13</sup>C NMR spectrum (151 MHz, Chloroform-*d*) of **4H-benzo[*p*]indeno[7,1,2-*ghi*] chrysen-4-one**
